# Supplementary material for: DFT study on the cycloaddition reactions of [c]-annelated carbo- and heterocyclic five-membered dienes with ethyleneElectronic supplementary information (ESI) available: figures and tables of the principal geometric parameters of all the dienes, transition states and products obtained at the B3LYP/6-31G* level and the Cartesian coordinates of all the optimized structures considered in this study. See http://www.rsc.org/suppdata/p2/b2/b205663a/
Source: Royal Society of Chemistry journal article supplement (doi:10.1039/b205663a), 2002-10-03
Supplement: b205663a.pdf [file b205663a.pdf]

## Supplementary Material

(26 pages including this page)

### Title: A DFT Study of Cycloaddition Reactions of [c]-Annulated Carbo and Heterocyclic Five Membered Dienes with Ethylene.

Authors: T.C. Dinadayalane and G. Narahari Sastry\*

Department of Chemistry, Pondicherry University, Pondicherry – 605 014, India

**Figure 1:** The B3LYP/6-31G\* optimized geometries (bond lengths in Å and angles in degrees) of the dienes **1X**; (X = CH<sub>2</sub>, SiH<sub>2</sub>, NH, PH, O and S).

**Figure 2:** The B3LYP/6-31G\* optimized geometries (bond lengths in Å and angles in degrees) of the dienes **2X**; (X = CH<sub>2</sub>, SiH<sub>2</sub>, NH, PH, O and S).

**Figure 3:** The B3LYP/6-31G\* optimized geometries (bond lengths in Å and angles in degrees) of the dienes **3X**; (X = CH<sub>2</sub>, SiH<sub>2</sub>, NH, PH, O and S).

**Table 1:** The B3LYP/6-31G\* geometries obtained for the transition states (**TS**) and products (**Pr**) of the cycloaddition reactions of dienes **1X** with ethylene. The bond lengths and angles are given in Å and degrees respectively (see Scheme 2 for designation).

**Table 2:** The B3LYP/6-31G\* geometries obtained for the transition states (**TS**) and products (**Pr1** and **Pr2**) of the cycloaddition reactions of dienes **2CH<sub>2</sub>**, **2SiH<sub>2</sub>** and **2NH** with ethylene. The bond lengths and angles are given in Å and degrees respectively (see Scheme 2 for designation).

**Table 2 (contd.):** The B3LYP/6-31G\* geometries obtained for the transition states (**TS**) and products (**Pr1** and **Pr2**) of the cycloaddition reactions of dienes **2PH**, **2O** and **2S** with ethylene. The bond lengths and angles are given in Å and degrees respectively (see Scheme 2 for designation).

**Table 3:** The B3LYP/6-31G\* geometries obtained for the transition states (**TS**) and products (**Pr**) of the cycloaddition reactions of dienes **3X** with ethylene. The bond lengths and angles are given in Å and degrees respectively (see Scheme 2 for designation).

**Table 4:** The B3LYP/6-31G\* optimized Cartesian coordinates of all the reactants, transition states and products along with their total energies (in hartrees).

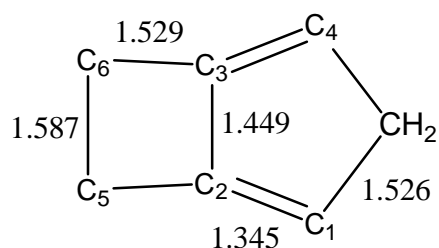

$\angle C_4-C-C_1$  105.3     $\angle C_3-C_2-C_5$  92.6  
 $\angle C-C_1-C_2$  106.0     $\angle C_2-C_5-C_6$  87.4  
 $\angle C_1-C_2-C_3$  111.3

**1CH<sub>2</sub>**

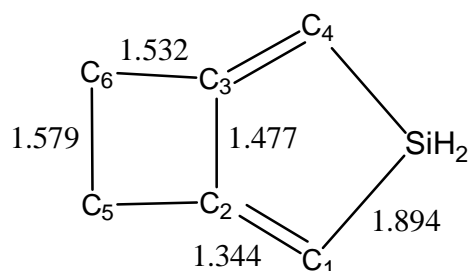

$\angle C_4-Si-C_1$  95.5     $\angle C_3-C_2-C_5$  91.9  
 $\angle Si-C_1-C_2$  102.7     $\angle C_2-C_5-C_6$  88.1  
 $\angle C_1-C_2-C_3$  119.6

**1SiH<sub>2</sub>**

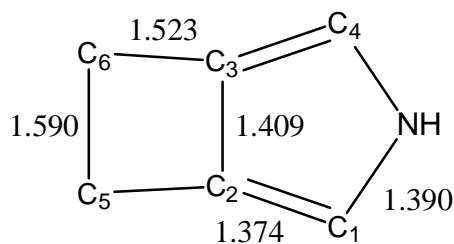

$\angle C_4-N-C_1$  111.9     $\angle C_3-C_2-C_5$  93.4  
 $\angle N-C_1-C_2$  105.1     $\angle C_2-C_5-C_6$  86.6  
 $\angle C_1-C_2-C_3$  109.0

**1NH**

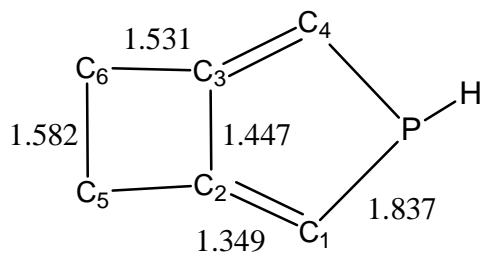

$\angle C_4-P-C_1$  92.7     $\angle C_3-C_2-C_5$  92.5  
 $\angle P-C_1-C_2$  106.5     $\angle C_2-C_5-C_6$  87.5  
 $\angle C_1-C_2-C_3$  116.7

**1PH**

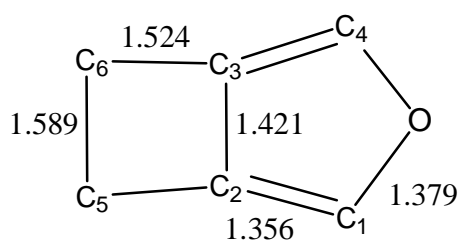

$\angle C_4-O-C_1$  108.7     $\angle C_3-C_2-C_5$  93.2  
 $\angle O-C_1-C_2$  108.0     $\angle C_2-C_5-C_6$  86.8  
 $\angle C_1-C_2-C_3$  107.6

**1O**

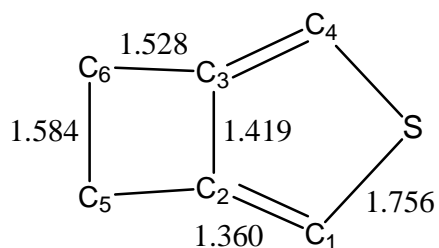

$\angle C_4-S-C_1$  93.5     $\angle C_3-C_2-C_5$  93.1  
 $\angle S-C_1-C_2$  108.5     $\angle C_2-C_5-C_6$  86.9  
 $\angle C_1-C_2-C_3$  114.8

**1S**

**Figure 1:** The B3LYP/6-31G\* optimized geometries (bond lengths in Å and angles in degrees) of the dienes **1X**; (X = CH<sub>2</sub>, SiH<sub>2</sub>, NH, PH, O and S).

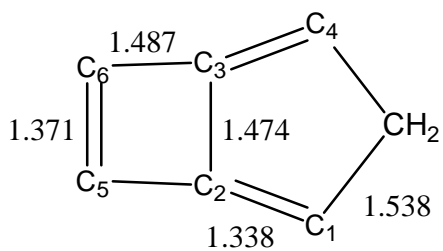

$\angle C_4-C-C_1$  104.2     $\angle C_3-C_2-C_5$  88.0  
 $\angle C-C_1-C_2$  107.1     $\angle C_2-C_5-C_6$  92.0  
 $\angle C_1-C_2-C_3$  110.8

**2CH<sub>2</sub>**

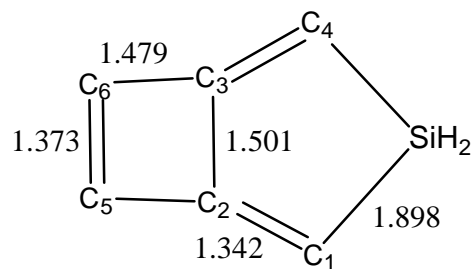

$\angle C_4-Si-C_1$  95.1     $\angle C_3-C_2-C_5$  87.5  
 $\angle Si-C_1-C_2$  103.5     $\angle C_2-C_5-C_6$  92.5  
 $\angle C_1-C_2-C_3$  118.9

**2SiH<sub>2</sub>**

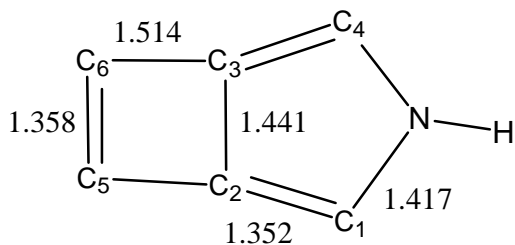

$\angle C_4-N-C_1$  108.8     $\angle C_3-C_2-C_5$  88.4  
 $\angle N-C_1-C_2$  106.9     $\angle C_2-C_5-C_6$  91.6  
 $\angle C_1-C_2-C_3$  108.6

**2NH**

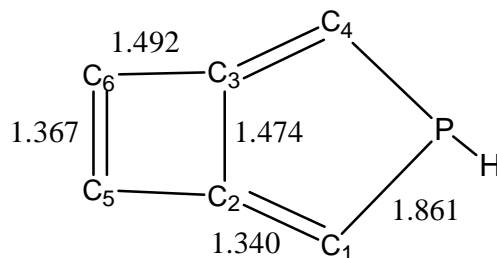

$\angle C_4-P-C_1$  91.3     $\angle C_3-C_2-C_5$  87.9  
 $\angle P-C_1-C_2$  107.8     $\angle C_2-C_5-C_6$  92.1  
 $\angle C_1-C_2-C_3$  116.3

**2PH**

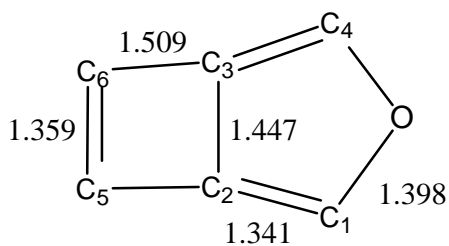

$\angle C_4-O-C_1$  107.0     $\angle C_3-C_2-C_5$  88.3  
 $\angle O-C_1-C_2$  109.2     $\angle C_2-C_5-C_6$  91.7  
 $\angle C_1-C_2-C_3$  107.4

**2O**

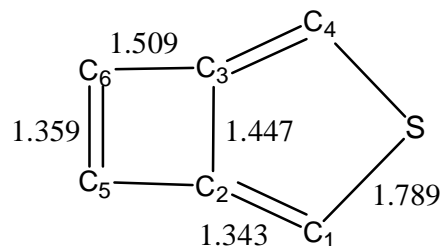

$\angle C_4-S-C_1$  91.9     $\angle C_3-C_2-C_5$  88.3  
 $\angle S-C_1-C_2$  109.3     $\angle C_2-C_5-C_6$  91.7  
 $\angle C_1-C_2-C_3$  114.8

**2S**

**Figure 2:** The B3LYP/6-31G\* optimized geometries (bond lengths in Å and angles in degrees) of the dienes **2X**; (X = CH<sub>2</sub>, SiH<sub>2</sub>, NH, PH, O and S).

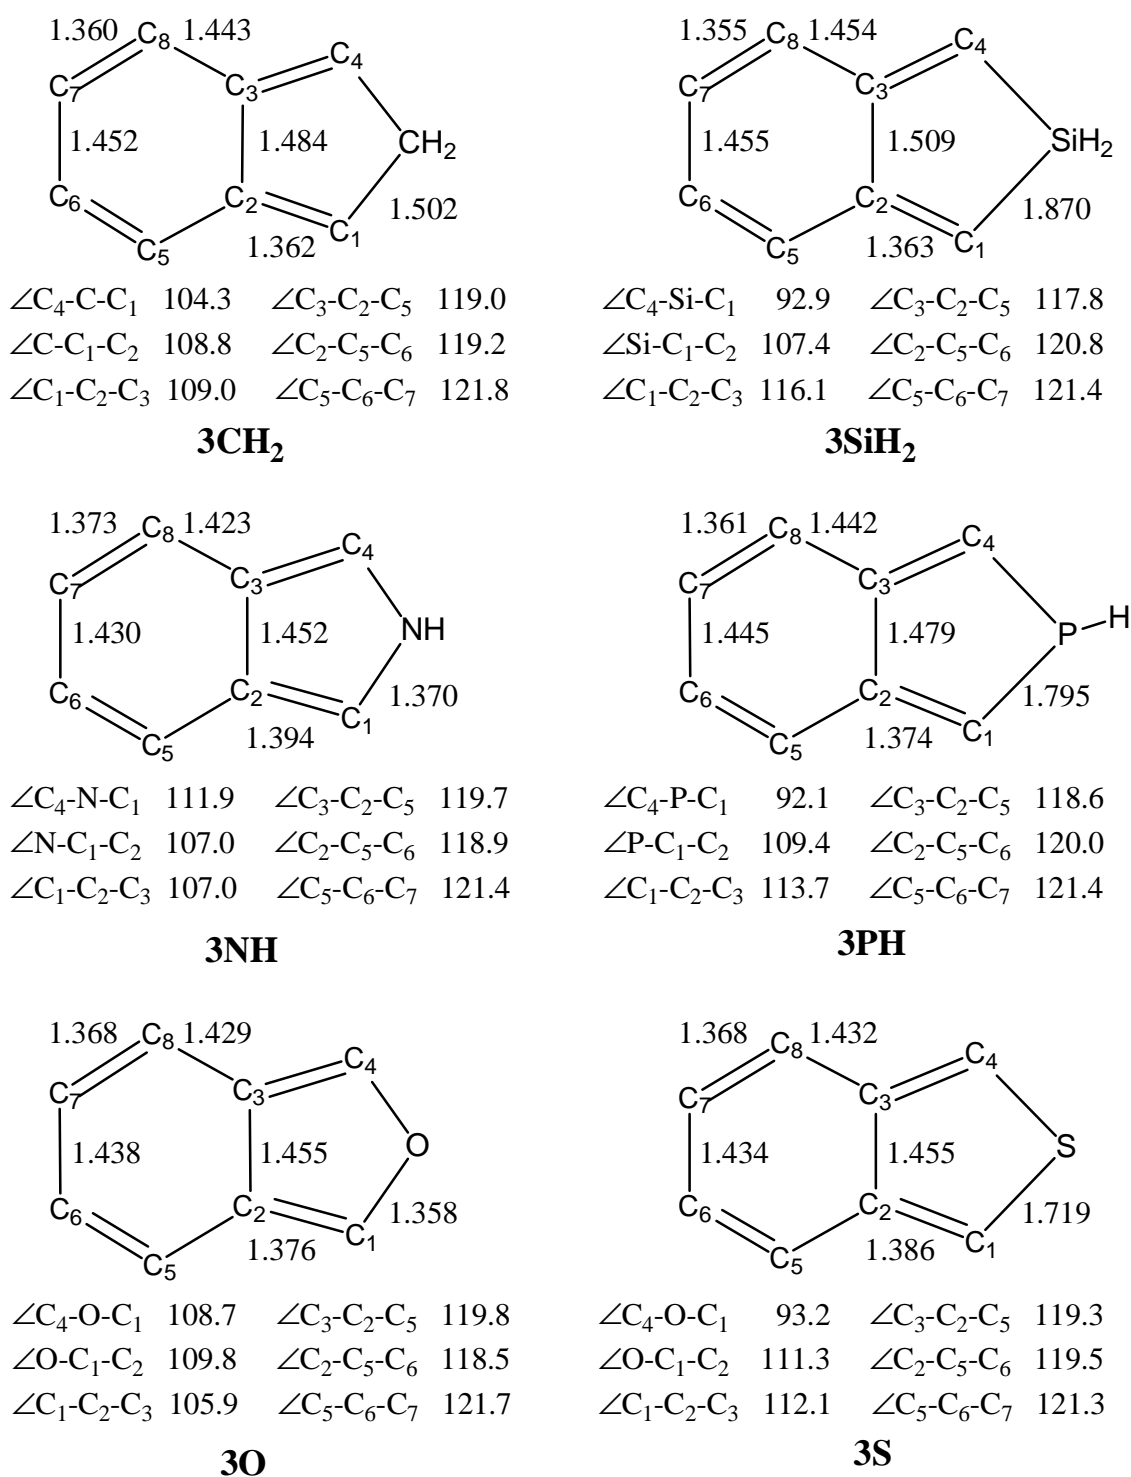

**Figure 3:** The B3LYP/6-31G\* optimized geometries (bond lengths in Å and angles in degrees) of the dienes **3X**; (X = CH<sub>2</sub>, SiH<sub>2</sub>, NH, PH, O and S).

**Table 1:** The B3LYP/6-31G\* geometries obtained for the transition states (**TS**) and products (**Pr**) of the cycloaddition reactions of dienes **1X** with ethylene. The bond lengths and angles are given in Å and degrees respectively (see Scheme 2 for designation).

| Para | <b>1CH<sub>2</sub></b> |       | <b>1SiH<sub>2</sub></b> |       | <b>1NH</b>        |            |             | <b>1PH</b> |             |            |             | <b>1O</b> |       | <b>1S</b> |       |
|------|------------------------|-------|-------------------------|-------|-------------------|------------|-------------|------------|-------------|------------|-------------|-----------|-------|-----------|-------|
|      | TS                     | Pr    | TS                      | Pr    | TS<br><i>anti</i> | Pr         |             | TS         |             | Pr         |             | TS        | Pr    | TS        | Pr    |
|      |                        |       |                         |       |                   | <i>syn</i> | <i>anti</i> | <i>syn</i> | <i>anti</i> | <i>syn</i> | <i>anti</i> |           |       |           |       |
| r1   | 1.529                  | 1.558 | 1.886                   | 1.928 | 1.414             | 1.493      | 1.498       | 1.866      | 1.850       | 1.915      | 1.917       | 1.384     | 1.447 | 1.787     | 1.874 |
| r2   | 1.392                  | 1.513 | 1.395                   | 1.506 | 1.425             | 1.522      | 1.511       | 1.392      | 1.400       | 1.507      | 1.509       | 1.411     | 1.516 | 1.412     | 1.511 |
| r3   | 1.395                  | 1.340 | 1.407                   | 1.334 | 1.369             | 1.342      | 1.337       | 1.396      | 1.392       | 1.340      | 1.339       | 1.376     | 1.338 | 1.377     | 1.337 |
| r4   | 1.526                  | 1.526 | 1.529                   | 1.525 | 1.522             | 1.530      | 1.524       | 1.530      | 1.527       | 1.528      | 1.525       | 1.524     | 1.527 | 1.527     | 1.527 |
| r5   | 1.586                  | 1.584 | 1.579                   | 1.586 | 1.587             | 1.579      | 1.585       | 1.580      | 1.582       | 1.581      | 1.586       | 1.584     | 1.581 | 1.580     | 1.581 |
| r6   | 2.252                  | 1.573 | 2.229                   | 1.576 | 2.137             | 1.565      | 1.577       | 2.238      | 2.232       | 1.576      | 1.567       | 2.165     | 1.567 | 2.181     | 1.566 |
| r7   | 1.388                  | 1.564 | 1.400                   | 1.570 | 1.408             | 1.561      | 1.561       | 1.397      | 1.394       | 1.566      | 1.564       | 1.398     | 1.560 | 1.404     | 1.563 |
| a1   | 101.8                  | 95.7  | 90.9                    | 83.8  | 105.3             | 96.8       | 96.5        | 87.1       | 87.5        | 80.6       | 80.6        | 105.2     | 98.2  | 87.8      | 80.9  |
| a2   | 103.8                  | 98.1  | 100.8                   | 93.8  | 103.1             | 101.1      | 97.6        | 106.8      | 102.2       | 101.5      | 95.5        | 105.8     | 99.7  | 106.3     | 100.4 |
| a3   | 110.6                  | 108.7 | 117.3                   | 114.1 | 108.0             | 107.0      | 107.3       | 115.0      | 114.6       | 112.2      | 112.2       | 107.0     | 106.2 | 112.9     | 111.2 |
| a4   | 93.6                   | 94.6  | 93.2                    | 94.6  | 94.1              | 94.4       | 94.7        | 93.4       | 93.6        | 94.5       | 94.6        | 93.9      | 94.6  | 93.8      | 94.6  |
| a5   | 86.4                   | 85.4  | 86.8                    | 85.4  | 85.9              | 85.6       | 85.3        | 86.6       | 86.4        | 85.5       | 85.4        | 86.1      | 85.4  | 86.2      | 85.4  |
| a6   | 89.1                   | 99.5  | 86.3                    | 99.1  | 94.2              | 98.6       | 102.6       | 86.2       | 95.7        | 97.8       | 103.4       | 91.2      | 100.6 | 93.8      | 101.0 |
| a7   | 99.7                   | 105.5 | 100.8                   | 106.2 | 97.8              | 106.0      | 105.4       | 99.7       | 98.4        | 105.2      | 106.1       | 99.4      | 106.6 | 96.8      | 105.2 |
| a8   | 102.6                  | 103.7 | 106.8                   | 108.6 | 101.3             | 102.4      | 102.3       | 105.2      | 105.1       | 106.8      | 107.0       | 100.7     | 101.5 | 104.3     | 106.1 |
| φ    | 105.6                  | 111.9 | 112.1                   | 118.3 | 102.2             | 111.3      | 110.7       | 108.7      | 106.9       | 114.8      | 116.0       | 103.4     | 111.3 | 103.9     | 113.9 |

**Table 2:** The B3LYP/6-31G\* geometries obtained for the transition states (**TS**) and products (**Pr1** and **Pr2**) of the cycloaddition reactions of dienes **2CH<sub>2</sub>**, **2SiH<sub>2</sub>** and **2NH** with ethylene. The bond lengths and angles are given in Å and degrees respectively (see Scheme 2 for designation).

| Para | <b>2CH<sub>2</sub></b> |            |            | <b>2SiH<sub>2</sub></b> |            |            | <b>2NH</b>               |            |             |            |             |
|------|------------------------|------------|------------|-------------------------|------------|------------|--------------------------|------------|-------------|------------|-------------|
|      | <b>TS</b>              | <b>Pr1</b> | <b>Pr2</b> | <b>TS</b>               | <b>Pr1</b> | <b>Pr2</b> | <b>TS</b><br><i>anti</i> | <b>Pr1</b> |             | <b>Pr2</b> |             |
|      |                        |            |            |                         |            |            |                          | <i>syn</i> | <i>anti</i> | <i>syn</i> | <i>anti</i> |
| r1   | 1.536                  | 1.553      | 1.573      | 1.892                   | 1.921      | 1.945      | 1.420                    | 1.489      | 1.488       | 1.511      | 1.509       |
| r2   | 1.395                  | 1.508      | 1.493      | 1.400                   | 1.497      | 1.480      | 1.422                    | 1.518      | 1.509       | 1.498      | 1.495       |
| r3   | 1.401                  | 1.354      | 1.545      | 1.408                   | 1.356      | 1.562      | 1.388                    | 1.355      | 1.354       | 1.552      | 1.541       |
| r4   | 1.539                  | 1.573      | 1.339      | 1.545                   | 1.577      | 1.342      | 1.564                    | 1.576      | 1.570       | 1.342      | 1.337       |
| r5   | 1.349                  | 1.336      | 1.607      | 1.346                   | 1.336      | 1.593      | 1.343                    | 1.334      | 1.335       | 1.589      | 1.610       |
| r6   | 2.123                  | 1.574      | 1.561      | 2.089                   | 1.586      | 1.569      | 2.082                    | 1.565      | 1.579       | 1.551      | 1.565       |
| r7   | 1.404                  | 1.555      | 1.570      | 1.420                   | 1.561      | 1.579      | 1.412                    | 1.553      | 1.552       | 1.567      | 1.567       |
| a1   | 99.7                   | 95.3       | 97.2       | 88.9                    | 83.5       | 85.7       | 103.4                    | 96.3       | 96.3        | 98.4       | 97.9        |
| a2   | 103.5                  | 98.5       | 98.5       | 100.2                   | 95.1       | 95.9       | 103.4                    | 101.2      | 98.0        | 100.1      | 97.6        |
| a3   | 109.9                  | 108.2      | 105.8      | 116.4                   | 113.6      | 111.5      | 107.2                    | 106.5      | 106.6       | 104.2      | 104.2       |
| a4   | 89.0                   | 89.7       | 91.3       | 88.9                    | 89.6       | 90.7       | 89.2                     | 89.6       | 89.7        | 90.8       | 91.5        |
| a5   | 91.0                   | 90.3       | 88.7       | 91.1                    | 90.4       | 89.3       | 90.8                     | 90.4       | 90.3        | 89.2       | 88.5        |
| a6   | 91.6                   | 100.3      | 99.8       | 89.1                    | 99.0       | 97.3       | 96.2                     | 99.5       | 103.5       | 99.2       | 103.3       |
| a7   | 101.2                  | 105.1      | 106.4      | 102.6                   | 106.1      | 106.3      | 98.7                     | 105.8      | 105.0       | 108.3      | 106.6       |
| a8   | 102.9                  | 103.6      | 104.6      | 107.1                   | 108.3      | 109.9      | 101.3                    | 102.3      | 102.1       | 103.5      | 103.1       |
| φ    | 107.2                  | 111.2      | 112.2      | 114.1                   | 117.6      | 117.6      | 102.9                    | 110.8      | 109.9       | 113.2      | 111.2       |

**Table 2** (contd.): The B3LYP/6-31G\* geometries obtained for the transition states (**TS**) and products (**Pr1** and **Pr2**) of the cycloaddition reactions of dienes **2PH**, **2O** and **2S** with ethylene. The bond lengths and angles are given in Å and degrees respectively (see Scheme 2 for designation).

| Para | <b>2PH</b> |             |            |             |            |             | <b>2O</b> |            |            | <b>2S</b> |            |            |
|------|------------|-------------|------------|-------------|------------|-------------|-----------|------------|------------|-----------|------------|------------|
|      | <b>TS</b>  |             | <b>Pr1</b> |             | <b>Pr2</b> |             | <b>TS</b> | <b>Pr1</b> | <b>Pr2</b> | <b>TS</b> | <b>Pr1</b> | <b>Pr2</b> |
|      | <i>syn</i> | <i>anti</i> | <i>syn</i> | <i>anti</i> | <i>syn</i> | <i>anti</i> |           |            |            |           |            |            |
| r1   | 1.873      | 1.870       | 1.905      | 1.912       | 1.951      | 1.955       | 1.392     | 1.442      | 1.466      | 1.801     | 1.862      | 1.914      |
| r2   | 1.395      | 1.398       | 1.500      | 1.501       | 1.471      | 1.479       | 1.410     | 1.513      | 1.495      | 1.408     | 1.507      | 1.474      |
| r3   | 1.401      | 1.400       | 1.354      | 1.353       | 1.554      | 1.553       | 1.393     | 1.354      | 1.547      | 1.392     | 1.353      | 1.552      |
| r4   | 1.546      | 1.542       | 1.578      | 1.575       | 1.345      | 1.341       | 1.544     | 1.573      | 1.339      | 1.547     | 1.577      | 1.343      |
| r5   | 1.345      | 1.347       | 1.334      | 1.336       | 1.577      | 1.592       | 1.343     | 1.334      | 1.599      | 1.343     | 1.333      | 1.576      |
| r6   | 2.112      | 2.116       | 1.579      | 1.572       | 1.559      | 1.556       | 2.098     | 1.569      | 1.552      | 2.104     | 1.568      | 1.550      |
| r7   | 1.413      | 1.408       | 1.558      | 1.555       | 1.572      | 1.570       | 1.404     | 1.552      | 1.565      | 1.411     | 1.555      | 1.567      |
| a1   | 85.5       | 85.2        | 80.5       | 80.2        | 82.0       | 81.5        | 103.2     | 97.7       | 99.3       | 86.0      | 80.7       | 81.9       |
| a2   | 106.2      | 101.8       | 101.8      | 96.2        | 99.9       | 96.8        | 106.0     | 99.9       | 99.2       | 106.1     | 100.5      | 98.2       |
| a3   | 114.2      | 113.8       | 111.6      | 111.7       | 110.0      | 109.7       | 106.2     | 105.7      | 103.3      | 112.2     | 110.6      | 109.0      |
| a4   | 89.0       | 89.0        | 89.6       | 89.7        | 90.5       | 90.8        | 89.1      | 89.6       | 91.1       | 89.1      | 89.6       | 90.5       |
| a5   | 91.0       | 91.0        | 90.4       | 90.3        | 89.5       | 89.2        | 90.9      | 90.4       | 88.9       | 90.9      | 90.4       | 89.5       |
| a6   | 88.7       | 97.5        | 98.6       | 104.0       | 97.6       | 102.1       | 93.5      | 101.6      | 101.5      | 95.6      | 102.0      | 101.0      |
| a7   | 101.5      | 100.1       | 105.0      | 105.8       | 107.8      | 106.8       | 100.3     | 106.4      | 108.6      | 98.4      | 105.2      | 108.3      |
| a8   | 105.5      | 105.4       | 106.6      | 106.8       | 108.5      | 108.4       | 100.7     | 101.4      | 102.4      | 104.4     | 105.8      | 107.7      |
| φ    | 110.5      | 108.7       | 114.2      | 115.2       | 117.7      | 116.3       | 104.2     | 110.8      | 112.8      | 105.5     | 113.4      | 117.2      |

**Table 3:** The B3LYP/6-31G\* geometries obtained for the transition states (**TS**) and products (**Pr**) of the cycloaddition reactions of dienes **3X** with ethylene. The bond lengths and angles are given in Å and degrees respectively (see Scheme 2 for designation).

| Para | <b>3CH<sub>2</sub></b> |           | <b>3SiH<sub>2</sub></b> |           | <b>3NH</b>               |            |             | <b>3PH</b> |             |            |             | <b>3O</b> |           | <b>3S</b> |           |
|------|------------------------|-----------|-------------------------|-----------|--------------------------|------------|-------------|------------|-------------|------------|-------------|-----------|-----------|-----------|-----------|
|      | <b>TS</b>              | <b>Pr</b> | <b>TS</b>               | <b>Pr</b> | <b>TS</b><br><i>anti</i> | <b>Pr</b>  |             | <b>TS</b>  |             | <b>Pr</b>  |             | <b>TS</b> | <b>Pr</b> | <b>TS</b> | <b>Pr</b> |
|      |                        |           |                         |           |                          | <i>syn</i> | <i>anti</i> | <i>syn</i> | <i>anti</i> | <i>syn</i> | <i>anti</i> |           |           |           |           |
| r1   | 1.505                  | 1.552     | 1.866                   | 1.919     | 1.391                    | 1.491      | 1.491       | 1.836      | 1.810       | 1.911      | 1.910       | 1.365     | 1.445     | 1.751     | 1.871     |
| r2   | 1.399                  | 1.518     | 1.401                   | 1.515     | 1.437                    | 1.525      | 1.516       | 1.402      | 1.416       | 1.512      | 1.516       | 1.421     | 1.520     | 1.429     | 1.515     |
| r3   | 1.450                  | 1.409     | 1.465                   | 1.417     | 1.424                    | 1.407      | 1.405       | 1.448      | 1.445       | 1.411      | 1.411       | 1.427     | 1.404     | 1.427     | 1.408     |
| r4   | 1.425                  | 1.388     | 1.433                   | 1.393     | 1.405                    | 1.387      | 1.386       | 1.427      | 1.422       | 1.388      | 1.390       | 1.410     | 1.386     | 1.412     | 1.386     |
| r5   | 1.373                  | 1.403     | 1.369                   | 1.400     | 1.387                    | 1.404      | 1.404       | 1.373      | 1.375       | 1.404      | 1.402       | 1.382     | 1.404     | 1.383     | 1.405     |
| r6   | 1.432                  | 1.396     | 1.432                   | 1.396     | 1.414                    | 1.396      | 1.396       | 1.428      | 1.424       | 1.394      | 1.396       | 1.419     | 1.396     | 1.416     | 1.394     |
| r7   | 1.373                  | 1.563     | 1.379                   | 1.567     | 1.398                    | 1.561      | 1.561       | 1.381      | 1.380       | 1.564      | 1.561       | 1.387     | 1.560     | 1.391     | 1.561     |
| r8   | 2.391                  | 1.564     | 2.404                   | 1.565     | 2.211                    | 1.558      | 1.569       | 2.380      | 2.356       | 1.562      | 1.556       | 2.257     | 1.559     | 2.274     | 1.555     |
| a1   | 102.2                  | 94.2      | 90.4                    | 82.0      | 106.4                    | 95.2       | 95.2        | 87.0       | 88.3        | 78.9       | 79.0        | 105.9     | 96.7      | 88.3      | 79.3      |
| a2   | 107.1                  | 100.1     | 105.9                   | 97.3      | 105.5                    | 103.1      | 99.3        | 111.0      | 105.8       | 103.3      | 98.1        | 108.3     | 101.5     | 109.6     | 102.0     |
| a3   | 108.6                  | 106.6     | 115.0                   | 111.3     | 106.2                    | 105.1      | 105.2       | 112.7      | 112.3       | 109.7      | 109.6       | 105.3     | 104.4     | 110.8     | 108.8     |
| a4   | 119.6                  | 120.8     | 118.6                   | 120.1     | 120.4                    | 120.9      | 121.0       | 119.2      | 119.3       | 120.5      | 120.5       | 120.4     | 121.1     | 119.9     | 120.7     |
| a5   | 119.1                  | 118.5     | 120.5                   | 119.4     | 118.5                    | 118.3      | 118.2       | 119.8      | 119.7       | 119.0      | 119.0       | 118.3     | 118.1     | 119.2     | 118.7     |
| a6   | 121.3                  | 120.7     | 120.9                   | 120.4     | 121.1                    | 120.8      | 120.8       | 121.0      | 120.9       | 120.5      | 120.6       | 121.3     | 120.8     | 120.9     | 120.6     |
| a7   | 88.2                   | 100.5     | 84.7                    | 99.9      | 93.7                     | 99.2       | 103.5       | 85.3       | 95.8        | 99.1       | 104.3       | 90.3      | 101.3     | 94.0      | 102.0     |
| a8   | 97.7                   | 106.8     | 99.0                    | 107.5     | 96.6                     | 107.3      | 106.8       | 97.4       | 96.4        | 107.2      | 107.5       | 97.9      | 108.0     | 94.9      | 107.3     |
| a9   | 101.7                  | 103.1     | 105.3                   | 107.7     | 100.8                    | 101.9      | 101.8       | 103.9      | 104.0       | 106.1      | 106.2       | 100.1     | 101.1     | 103.3     | 105.4     |
| φ    | 102.4                  | 112.3     | 107.9                   | 117.6     | 100.2                    | 111.8      | 111.3       | 104.3      | 103.2       | 115.5      | 115.9       | 101.1     | 112.0     | 100.6     | 114.8     |



**Table 4:** The B3LYP/6-31G\* optimized Cartesian coordinates of all the reactants, transition states and products along with their total energies (in hartrees).

| Ethylene |          |           |           | E= -78.58746 |           |           |           |
|----------|----------|-----------|-----------|--------------|-----------|-----------|-----------|
| C        | 0.000000 | 0.000000  | 0.665422  | C            | -0.810940 | 1.844484  | 0.694130  |
| C        | 0.000000 | 0.000000  | -0.665422 | H            | -1.602361 | 1.346663  | -1.245054 |
| H        | 0.000000 | 0.923450  | 1.239848  | H            | -1.602361 | 1.346663  | 1.245054  |
| H        | 0.000000 | -0.923450 | 1.239848  | H            | -0.444151 | -2.891419 | 1.261291  |
| H        | 0.000000 | 0.923450  | -1.239848 | H            | -0.444151 | -2.891419 | -1.261291 |
| H        | 0.000000 | -0.923450 | -1.239848 | H            | -1.780582 | -1.719516 | 1.239421  |
|          |          |           |           | H            | -1.780582 | -1.719516 | -1.239421 |
|          |          |           |           | H            | -0.302864 | 2.634337  | -1.240056 |
|          |          |           |           | H            | -0.302864 | 2.634337  | 1.240056  |

  

| 1CH <sub>2</sub> |           |           |           | E = -271.4690108 |           |           |           |
|------------------|-----------|-----------|-----------|------------------|-----------|-----------|-----------|
| C                | 0.000000  | 0.724267  | -0.215497 | C                | 0.178296  | -0.767599 | 0.669859  |
| C                | 0.000000  | -0.724267 | -0.215497 | C                | 0.178296  | -0.767599 | -0.669859 |
| C                | 0.000000  | 0.793644  | -1.742711 | C                | -0.667569 | -2.032273 | 0.791990  |
| C                | 0.000000  | -0.793644 | -1.742711 | C                | -0.667569 | -2.032273 | -0.791990 |
| C                | 0.000000  | -1.213783 | 1.037298  | C                | 0.551993  | 0.615465  | -1.154994 |
| C                | 0.000000  | 1.213783  | 1.037298  | C                | 0.551993  | 0.615465  | 1.154994  |
| H                | 0.000000  | -2.237862 | 1.394306  | H                | 0.921193  | 0.747546  | -2.174942 |
| H                | 0.000000  | 2.237862  | 1.394306  | H                | 0.921193  | 0.747546  | 2.174942  |
| C                | 0.000000  | 0.000000  | 1.962909  | C                | 1.526344  | 0.996094  | 0.000000  |
| H                | -0.877929 | 0.000000  | 2.628370  | H                | 2.442807  | 0.398154  | 0.000000  |
| H                | 0.877929  | 0.000000  | 2.628370  | H                | 1.782908  | 2.062748  | 0.000000  |
| H                | -0.888199 | 1.249996  | -2.192973 | C                | -0.667569 | 1.536600  | -0.781837 |
| H                | -0.888199 | -1.249996 | -2.192973 | C                | -0.667569 | 1.536600  | 0.781837  |
| H                | 0.888199  | 1.249996  | -2.192973 | H                | -1.604223 | 1.162444  | -1.206940 |
| H                | 0.888199  | -1.249996 | -2.192973 | H                | -1.604223 | 1.162444  | 1.206940  |

  

| 1CH <sub>2</sub> -Pr |           |           |           | E = -271.4690108 |           |           |           |
|----------------------|-----------|-----------|-----------|------------------|-----------|-----------|-----------|
| C                    | 0.178296  | -0.767599 | 0.669859  | C                | 0.178296  | -0.767599 | 0.669859  |
| C                    | 0.178296  | -0.767599 | -0.669859 | C                | -0.667569 | -2.032273 | 0.791990  |
| C                    | -0.667569 | -2.032273 | 0.791990  | C                | -0.667569 | -2.032273 | -0.791990 |
| C                    | -0.667569 | -2.032273 | -0.791990 | C                | 0.551993  | 0.615465  | -1.154994 |
| C                    | 0.551993  | 0.615465  | -1.154994 | C                | 0.551993  | 0.615465  | 1.154994  |
| C                    | 0.551993  | 0.615465  | 1.154994  | H                | 0.921193  | 0.747546  | -2.174942 |
| H                    | 0.921193  | 0.747546  | -2.174942 | H                | 0.921193  | 0.747546  | 2.174942  |
| H                    | 0.921193  | 0.747546  | 2.174942  | C                | 1.526344  | 0.996094  | 0.000000  |
| C                    | 1.526344  | 0.996094  | 0.000000  | H                | 2.442807  | 0.398154  | 0.000000  |
| H                    | 2.442807  | 0.398154  | 0.000000  | H                | 1.782908  | 2.062748  | 0.000000  |
| H                    | 1.782908  | 2.062748  | 0.000000  | C                | -0.667569 | 1.536600  | -0.781837 |
| C                    | -0.667569 | 1.536600  | -0.781837 | C                | -0.667569 | 1.536600  | 0.781837  |
| C                    | -0.667569 | 1.536600  | 0.781837  | H                | -1.604223 | 1.162444  | -1.206940 |
| H                    | -1.604223 | 1.162444  | -1.206940 | H                | -1.604223 | 1.162444  | 1.206940  |
| H                    | -1.604223 | 1.162444  | 1.206940  | H                | -0.201684 | -2.897321 | 1.279340  |
| H                    | -0.201684 | -2.897321 | 1.279340  | H                | -0.201684 | -2.897321 | -1.279340 |
| H                    | -0.201684 | -2.897321 | -1.279340 | H                | -1.667825 | -1.892330 | 1.221362  |
| H                    | -1.667825 | -1.892330 | 1.221362  | H                | -1.667825 | -1.892330 | -1.221362 |
| H                    | -1.667825 | -1.892330 | -1.221362 | H                | -0.510262 | 2.547768  | -1.175056 |
| H                    | -0.510262 | 2.547768  | -1.175056 | H                | -0.510262 | 2.547768  | 1.175056  |
| H                    | -0.510262 | 2.547768  | 1.175056  |                  |           |           |           |

  

| 1CH <sub>2</sub> -TS |           |           |           | E = -271.4690108 |          |           |           |
|----------------------|-----------|-----------|-----------|------------------|----------|-----------|-----------|
| C                    | 0.182401  | -0.815963 | 0.697740  | C                | 0.000000 | 0.738552  | -0.537831 |
| C                    | 0.182401  | -0.815963 | -0.697740 | C                | 0.000000 | -0.738552 | -0.537831 |
| C                    | -0.810940 | -1.970867 | 0.793083  | C                | 0.000000 | 0.789541  | -2.068517 |
| C                    | -0.810940 | -1.970867 | -0.793083 | C                | 0.000000 | -0.789541 | -2.068517 |
| C                    | 0.788089  | 0.337558  | -1.186616 | C                | 0.000000 | -0.789541 | -2.068517 |
| C                    | 0.788089  | 0.337558  | 1.186616  | C                | 0.000000 | -1.401433 | 0.631138  |
| H                    | 1.038594  | 0.571698  | -2.216931 |                  |          |           |           |
| H                    | 1.038594  | 0.571698  | 2.216931  |                  |          |           |           |
| C                    | 1.604556  | 0.850233  | 0.000000  |                  |          |           |           |
| H                    | 2.584975  | 0.345068  | 0.000000  |                  |          |           |           |
| H                    | 1.787091  | 1.927451  | 0.000000  |                  |          |           |           |
| C                    | -0.810940 | 1.844484  | -0.694130 |                  |          |           |           |

  

| 1SiH <sub>2</sub> |          |           |           | E = -271.4690108 |          |           |           |
|-------------------|----------|-----------|-----------|------------------|----------|-----------|-----------|
| C                 | 0.000000 | 0.738552  | -0.537831 | C                | 0.000000 | 0.738552  | -0.537831 |
| C                 | 0.000000 | -0.738552 | -0.537831 | C                | 0.000000 | -0.738552 | -0.537831 |
| C                 | 0.000000 | 0.789541  | -2.068517 | C                | 0.000000 | 0.789541  | -2.068517 |
| C                 | 0.000000 | -0.789541 | -2.068517 | C                | 0.000000 | -0.789541 | -2.068517 |
| C                 | 0.000000 | -1.401433 | 0.631138  | C                | 0.000000 | -1.401433 | 0.631138  |

|                            |           |           |           |                         |           |           |           |
|----------------------------|-----------|-----------|-----------|-------------------------|-----------|-----------|-----------|
| C                          | 0.000000  | 1.401433  | 0.631138  | H                       | 0.219395  | 0.624214  | 2.362663  |
| H                          | 0.000000  | -2.480135 | 0.753245  | Si                      | 1.300061  | 1.251915  | 0.000000  |
| H                          | 0.000000  | 2.480135  | 0.753245  | H                       | 2.647688  | 0.624986  | 0.000000  |
| Si                         | 0.000000  | 0.000000  | 1.905113  | H                       | 1.450501  | 2.743717  | 0.000000  |
| H                          | -1.199473 | 0.000000  | 2.792672  | C                       | -1.258733 | 1.243370  | -0.784873 |
| H                          | 1.199473  | 0.000000  | 2.792672  | C                       | -1.258733 | 1.243370  | 0.784873  |
| H                          | -0.887908 | 1.249558  | -2.515225 | H                       | -2.137797 | 0.716434  | -1.173049 |
| H                          | -0.887908 | -1.249558 | -2.515225 | H                       | -2.137797 | 0.716434  | 1.173049  |
| H                          | 0.887908  | 1.249558  | -2.515225 | H                       | 0.707806  | -2.901766 | 1.259903  |
| H                          | 0.887908  | -1.249558 | -2.515225 | H                       | 0.707806  | -2.901766 | -1.259903 |
| <hr/>                      |           |           |           | H                       | -1.058815 | -2.694642 | 1.238184  |
| <hr/>                      |           |           |           | H                       | -1.058815 | -2.694642 | -1.238184 |
| <hr/>                      |           |           |           | H                       | -1.302474 | 2.268344  | -1.171651 |
| <hr/>                      |           |           |           | H                       | -1.302474 | 2.268344  | 1.171651  |
| <hr/>                      |           |           |           | <hr/>                   |           |           |           |
| <b>1SiH<sub>2</sub>-TS</b> |           |           |           | <b>E = -271.4690108</b> |           |           |           |
| <hr/>                      |           |           |           | <hr/>                   |           |           |           |
| C                          | -0.036879 | -0.932165 | 0.703552  | <b>1NH</b>              |           |           |           |
| C                          | -0.036879 | -0.932165 | -0.703552 | <b>E = -271.4690108</b> |           |           |           |
| C                          | -0.992014 | -2.123602 | 0.789562  | <hr/>                   |           |           |           |
| C                          | -0.992014 | -2.123602 | -0.789562 | C                       | 0.000000  | 0.704716  | -0.211940 |
| C                          | 0.475541  | 0.196291  | -1.344123 | C                       | 0.000000  | -0.704716 | -0.211940 |
| C                          | 0.475541  | 0.196291  | 1.344123  | C                       | 0.000000  | 0.795164  | -1.732082 |
| H                          | 0.515650  | 0.320955  | -2.422698 | C                       | 0.000000  | -0.795164 | -1.732082 |
| H                          | 0.515650  | 0.320955  | 2.422698  | C                       | 0.000000  | -1.151462 | 1.086901  |
| Si                         | 1.606025  | 0.883907  | 0.000000  | C                       | 0.000000  | 1.151462  | 1.086901  |
| H                          | 2.944926  | 0.221048  | 0.000000  | H                       | 0.000000  | -2.126541 | 1.553650  |
| H                          | 1.831298  | 2.355544  | 0.000000  | H                       | 0.000000  | 2.126541  | 1.553650  |
| C                          | -0.992014 | 1.745791  | -0.700142 | N                       | 0.000000  | 0.000000  | 1.865079  |
| C                          | -0.992014 | 1.745791  | 0.700142  | H                       | 0.000000  | 0.000000  | 2.873718  |
| H                          | -1.796393 | 1.256790  | -1.238787 | H                       | -0.888886 | 1.246638  | -2.187782 |
| H                          | -1.796393 | 1.256790  | 1.238787  | H                       | -0.888886 | -1.246638 | -2.187782 |
| H                          | -0.589261 | -3.027787 | 1.259698  | H                       | 0.888886  | 1.246638  | -2.187782 |
| H                          | -0.589261 | -3.027787 | -1.259698 | H                       | 0.888886  | -1.246638 | -2.187782 |
| H                          | -1.969114 | -1.907002 | 1.238026  | <hr/>                   |           |           |           |
| H                          | -1.969114 | -1.907002 | -1.238026 | <b>anti-1NH-TS</b>      |           |           |           |
| H                          | -0.518974 | 2.563509  | -1.235773 | <b>E = -271.4690108</b> |           |           |           |
| H                          | -0.518974 | 2.563509  | 1.235773  | <hr/>                   |           |           |           |
| <hr/>                      |           |           |           | C                       | 0.234245  | -0.813879 | 0.684430  |
| <hr/>                      |           |           |           | C                       | 0.234245  | -0.813879 | -0.684430 |
| <hr/>                      |           |           |           | C                       | -0.813787 | -1.912069 | 0.793360  |
| <hr/>                      |           |           |           | C                       | -0.813787 | -1.912069 | -0.793360 |
| C                          | 0.056366  | -0.839375 | 0.672100  | C                       | 0.830494  | 0.402968  | -1.124373 |
| C                          | 0.056366  | -0.839375 | -0.672100 | C                       | 0.830494  | 0.402968  | 1.124373  |
| C                          | -0.116939 | -2.349370 | 0.793095  | H                       | 1.192644  | 0.662682  | -2.113475 |
| C                          | -0.116939 | -2.349370 | -0.793095 | H                       | 1.192644  | 0.662682  | 2.113475  |
| C                          | 0.056366  | 0.535317  | -1.287722 | N                       | 1.581455  | 0.817756  | 0.000000  |
| C                          | 0.056366  | 0.535317  | 1.287722  | H                       | 1.897593  | 1.780686  | 0.000000  |
| H                          | 0.219395  | 0.624214  | -2.362663 | <hr/>                   |           |           |           |

|   |           |           |           |   |           |           |           |
|---|-----------|-----------|-----------|---|-----------|-----------|-----------|
| C | -0.813787 | 1.701878  | -0.704220 | N | 1.528902  | 0.933327  | 0.000000  |
| C | -0.813787 | 1.701878  | 0.704220  | H | 1.709054  | 1.941577  | 0.000000  |
| H | -1.609718 | 1.194587  | -1.242843 | C | -0.662544 | 1.525388  | -0.780576 |
| H | -1.609718 | 1.194587  | 1.242843  | C | -0.662544 | 1.525388  | 0.780576  |
| H | -0.502323 | -2.847471 | 1.272379  | H | -1.592722 | 1.140576  | -1.211388 |
| H | -0.502323 | -2.847471 | -1.272379 | H | -1.592722 | 1.140576  | 1.211388  |
| H | -1.772014 | -1.601831 | 1.227861  | H | -0.207135 | -2.893827 | 1.280090  |
| H | -1.772014 | -1.601831 | -1.227861 | H | -0.207135 | -2.893827 | -1.280090 |
| H | -0.415464 | 2.566154  | -1.232291 | H | -1.660709 | -1.869321 | 1.221083  |
| H | -0.415464 | 2.566154  | 1.232291  | H | -1.660709 | -1.869321 | -1.221083 |
|   |           |           |           | H | -0.510747 | 2.535817  | -1.178360 |
|   |           |           |           | H | -0.510747 | 2.535817  | 1.178360  |

---

***syn-1NH-Pr*** E = -271.4690108

|   |           |           |           |
|---|-----------|-----------|-----------|
| C | 0.204406  | -0.769472 | 0.670858  |
| C | 0.204406  | -0.769472 | -0.670858 |
| C | -0.665235 | -2.022685 | 0.789268  |
| C | -0.665235 | -2.022685 | -0.789268 |
| C | 0.572663  | 0.638640  | -1.116357 |
| C | 0.572663  | 0.638640  | 1.116357  |
| H | 1.009493  | 0.803998  | -2.103095 |
| H | 1.009493  | 0.803998  | 2.103095  |
| N | 1.467126  | 1.067484  | 0.000000  |
| H | 2.297724  | 0.470038  | 0.000000  |
| C | -0.665235 | 1.535713  | -0.780499 |
| C | -0.665235 | 1.535713  | 0.780499  |
| H | -1.588364 | 1.139238  | -1.213891 |
| H | -1.588364 | 1.139238  | 1.213891  |
| H | -0.214549 | -2.892759 | 1.280760  |
| H | -0.214549 | -2.892759 | -1.280760 |
| H | -1.661263 | -1.859804 | 1.219067  |
| H | -1.661263 | -1.859804 | -1.219067 |
| H | -0.508713 | 2.544944  | -1.172249 |
| H | -0.508713 | 2.544944  | 1.172249  |

---

***anti-1NH-Pr*** E = -271.4690108

|   |           |           |           |
|---|-----------|-----------|-----------|
| C | 0.199859  | -0.773336 | 0.668458  |
| C | 0.199859  | -0.773336 | -0.668458 |
| C | -0.662544 | -2.024020 | 0.792318  |
| C | -0.662544 | -2.024020 | -0.792318 |
| C | 0.582784  | 0.617814  | -1.117252 |
| C | 0.582784  | 0.617814  | 1.117252  |
| H | 1.020306  | 0.774244  | -2.105171 |
| H | 1.020306  | 0.774244  | 2.105171  |

---

***IPH*** E = -271.4690108

|   |           |           |           |
|---|-----------|-----------|-----------|
| C | -0.044962 | -0.535042 | 0.723550  |
| C | -0.044962 | -0.535042 | -0.723550 |
| C | -0.015189 | -2.064030 | 0.791038  |
| C | -0.015189 | -2.064030 | -0.791038 |
| C | -0.044962 | 0.670772  | -1.329137 |
| C | -0.044962 | 0.670772  | 1.329137  |
| H | -0.013065 | 0.897655  | -2.389204 |
| H | -0.013065 | 0.897655  | 2.389204  |
| P | 0.161854  | 1.922535  | 0.000000  |
| H | -1.118530 | 2.549496  | 0.000000  |
| H | 0.883085  | -2.494503 | 1.246085  |
| H | 0.883085  | -2.494503 | -1.246085 |
| H | -0.893975 | -2.527114 | 1.252084  |
| H | -0.893975 | -2.527114 | -1.252084 |

---

***syn-1PH-TS*** E = -271.4690108

|   |           |           |           |
|---|-----------|-----------|-----------|
| C | -0.010345 | -0.940600 | 0.697941  |
| C | -0.010345 | -0.940600 | -0.697941 |
| C | -1.019439 | -2.087333 | 0.789854  |
| C | -1.019439 | -2.087333 | -0.789854 |
| C | 0.531331  | 0.198831  | -1.285560 |
| C | 0.531331  | 0.198831  | 1.285560  |
| H | 0.653341  | 0.379823  | -2.349592 |
| H | 0.653341  | 0.379823  | 2.349592  |
| P | 1.619023  | 1.001903  | 0.000000  |
| H | 2.632827  | -0.014507 | 0.000000  |
| C | -1.019439 | 1.701422  | -0.698599 |
| C | -1.019439 | 1.701422  | 0.698599  |

|   |           |           |           |   |           |           |           |
|---|-----------|-----------|-----------|---|-----------|-----------|-----------|
| H | -1.806651 | 1.188494  | -1.241332 | C | -1.379165 | 0.935235  | -0.783133 |
| H | -1.806651 | 1.188494  | 1.241332  | C | -1.379165 | 0.935235  | 0.783133  |
| H | -0.658841 | -3.008190 | 1.261521  | H | -2.101342 | 0.218064  | -1.187753 |
| H | -0.658841 | -3.008190 | -1.261521 | H | -2.101342 | 0.218064  | 1.187753  |
| H | -1.985261 | -1.823884 | 1.237010  | H | 0.865499  | -2.921873 | 1.277620  |
| H | -1.985261 | -1.823884 | -1.237010 | H | 0.865499  | -2.921873 | -1.277620 |
| H | -0.554319 | 2.522815  | -1.235041 | H | -0.888234 | -2.628166 | 1.220488  |
| H | -0.554319 | 2.522815  | 1.235041  | H | -0.888234 | -2.628166 | -1.220488 |

**anti-1PH-TS** E = -271.4690108

|   |           |           |           |
|---|-----------|-----------|-----------|
| C | -0.036274 | -0.908301 | 0.696164  |
| C | -0.036274 | -0.908301 | -0.696164 |
| C | -1.042280 | -2.053143 | 0.791211  |
| C | -1.042280 | -2.053143 | -0.791211 |
| C | 0.528448  | 0.232614  | -1.279375 |
| C | 0.528448  | 0.232614  | 1.279375  |
| H | 0.679292  | 0.386318  | -2.344732 |
| H | 0.679292  | 0.386318  | 2.344732  |
| P | 1.756976  | 0.758759  | 0.000000  |
| H | 1.593271  | 2.173533  | 0.000000  |
| C | -1.042280 | 1.707732  | -0.697239 |
| C | -1.042280 | 1.707732  | 0.697239  |
| H | -1.838455 | 1.206276  | -1.238845 |
| H | -1.838455 | 1.206276  | 1.238845  |
| H | -0.682428 | -2.975339 | 1.261020  |
| H | -0.682428 | -2.975339 | -1.261020 |
| H | -2.007898 | -1.789247 | 1.238973  |
| H | -2.007898 | -1.789247 | -1.238973 |
| H | -0.570147 | 2.521123  | -1.239477 |
| H | -0.570147 | 2.521123  | 1.239477  |

**syn-1PH-Pr** E = -271.4690108

|   |          |           |           |
|---|----------|-----------|-----------|
| C | 0.315632 | -0.829557 | 0.669837  |
| C | 0.315632 | -0.829557 | -0.669837 |
| C | 0.077818 | -2.334622 | 0.790402  |
| C | 0.077818 | -2.334622 | -0.790402 |
| C | 0.077818 | 0.545016  | -1.238783 |
| C | 0.077818 | 0.545016  | 1.238783  |
| H | 0.272950 | 0.730783  | -2.296570 |
| H | 0.272950 | 0.730783  | 2.296570  |
| P | 1.041164 | 1.642360  | 0.000000  |
| H | 2.275667 | 0.928797  | 0.000000  |

**anti-1PH-Pr** E = -271.4690108

|   |           |           |           |
|---|-----------|-----------|-----------|
| C | 0.115677  | -0.852668 | 0.669741  |
| C | 0.115677  | -0.852668 | -0.669741 |
| C | -0.213539 | -2.336854 | 0.792815  |
| C | -0.213539 | -2.336854 | -0.792815 |
| C | 0.115677  | 0.544645  | -1.239860 |
| C | 0.115677  | 0.544645  | 1.239860  |
| H | 0.349681  | 0.679489  | -2.297389 |
| H | 0.349681  | 0.679489  | 2.297389  |
| P | 1.397635  | 1.247556  | 0.000000  |
| H | 0.960545  | 2.617125  | 0.000000  |
| C | -1.230731 | 1.201647  | -0.781798 |
| C | -1.230731 | 1.201647  | 0.781798  |
| H | -2.083095 | 0.639119  | -1.181572 |
| H | -2.083095 | 0.639119  | 1.181572  |
| H | 0.544349  | -2.970149 | 1.268933  |
| H | 0.544349  | -2.970149 | -1.268933 |
| H | -1.190837 | -2.575814 | 1.230544  |
| H | -1.190837 | -2.575814 | -1.230544 |
| H | -1.305138 | 2.221498  | -1.174212 |
| H | -1.305138 | 2.221498  | 1.174212  |

**10** E = -271.4690108

|   |          |           |           |
|---|----------|-----------|-----------|
| C | 0.000000 | 0.710372  | -0.195337 |
| C | 0.000000 | -0.710372 | -0.195337 |
| C | 0.000000 | 0.794491  | -1.717192 |
| C | 0.000000 | -0.794491 | -1.717192 |
| C | 0.000000 | -1.121052 | 1.096590  |
| C | 0.000000 | 1.121052  | 1.096590  |
| H | 0.000000 | -2.060229 | 1.628414  |
| H | 0.000000 | 2.060229  | 1.628414  |

|   |           |           |           |   |           |           |           |
|---|-----------|-----------|-----------|---|-----------|-----------|-----------|
| O | 0.000000  | 0.000000  | 1.899992  | H | -0.194179 | -2.893627 | -1.279657 |
| H | -0.889297 | 1.248769  | -2.166378 | H | -1.648389 | -1.869510 | 1.220903  |
| H | -0.889297 | -1.248769 | -2.166378 | H | -1.648389 | -1.869510 | -1.220903 |
| H | 0.889297  | 1.248769  | -2.166378 | H | -0.482394 | 2.549778  | -1.172370 |
| H | 0.889297  | -1.248769 | -2.166378 | H | -0.482394 | 2.549778  | 1.172370  |

---

**1O-TS** E = -271.4690108

---

|   |           |           |           |
|---|-----------|-----------|-----------|
| C | 0.246693  | -0.817986 | 0.688118  |
| C | 0.246693  | -0.817986 | -0.688118 |
| C | -0.807062 | -1.913672 | 0.792219  |
| C | -0.807062 | -1.913672 | -0.792219 |
| C | 0.837509  | 0.395492  | -1.099933 |
| C | 0.837509  | 0.395492  | 1.099933  |
| H | 1.258884  | 0.695282  | -2.051346 |
| H | 1.258884  | 0.695282  | 2.051346  |
| O | 1.531831  | 0.869464  | 0.000000  |
| C | -0.807062 | 1.744909  | -0.699194 |
| C | -0.807062 | 1.744909  | 0.699194  |
| H | -1.603349 | 1.246539  | -1.245385 |
| H | -1.603349 | 1.246539  | 1.245385  |
| H | -0.495304 | -2.847966 | 1.271644  |
| H | -0.495304 | -2.847966 | -1.271644 |
| H | -1.761299 | -1.597665 | 1.229261  |
| H | -1.761299 | -1.597665 | -1.229261 |
| H | -0.346731 | 2.573494  | -1.230237 |
| H | -0.346731 | 2.573494  | 1.230237  |

---

**1O-Pr** E = -271.4690108

---

|   |           |           |           |
|---|-----------|-----------|-----------|
| C | 0.211184  | -0.772267 | 0.669212  |
| C | 0.211184  | -0.772267 | -0.669212 |
| C | -0.651807 | -2.026294 | 0.790494  |
| C | -0.651807 | -2.026294 | -0.790494 |
| C | 0.586073  | 0.634393  | -1.093338 |
| C | 0.586073  | 0.634393  | 1.093338  |
| H | 1.086747  | 0.816607  | -2.044408 |
| H | 1.086747  | 0.816607  | 2.044408  |
| O | 1.463581  | 0.992300  | 0.000000  |
| C | -0.651807 | 1.542686  | -0.779871 |
| C | -0.651807 | 1.542686  | 0.779871  |
| H | -1.577969 | 1.156439  | -1.216598 |
| H | -1.577969 | 1.156439  | 1.216598  |
| H | -0.194179 | -2.893627 | 1.279657  |

---

**1S** E = -271.4690108

---

|   |           |           |           |
|---|-----------|-----------|-----------|
| C | 0.000000  | 0.709527  | -0.530220 |
| C | 0.000000  | -0.709527 | -0.530220 |
| C | 0.000000  | 0.792171  | -2.055589 |
| C | 0.000000  | -0.792171 | -2.055589 |
| C | 0.000000  | -1.279499 | 0.704901  |
| C | 0.000000  | 1.279499  | 0.704901  |
| H | 0.000000  | -2.312567 | 1.026757  |
| H | 0.000000  | 2.312567  | 1.026757  |
| S | 0.000000  | 0.000000  | 1.908242  |
| H | -0.889305 | 1.247962  | -2.503625 |
| H | -0.889305 | -1.247962 | -2.503625 |
| H | 0.889305  | 1.247962  | -2.503625 |
| H | 0.889305  | -1.247962 | -2.503625 |

---

**1S-TS** E = -271.4690108

---

|   |           |           |           |
|---|-----------|-----------|-----------|
| C | 0.421619  | -0.829481 | 0.688585  |
| C | 0.421619  | -0.829481 | -0.688585 |
| C | -0.106458 | -2.258514 | 0.789920  |
| C | -0.106458 | -2.258514 | -0.789920 |
| C | 0.421619  | 0.470570  | -1.238734 |
| C | 0.421619  | 0.470570  | 1.238734  |
| H | 0.543498  | 0.747425  | -2.281003 |
| H | 0.543498  | 0.747425  | 2.281003  |
| S | 1.138491  | 1.540228  | 0.000000  |
| C | -1.630214 | 0.979779  | -0.701788 |
| C | -1.630214 | 0.979779  | 0.701788  |
| H | -2.119950 | 0.170838  | -1.237149 |
| H | -2.119950 | 0.170838  | 1.237149  |
| H | 0.554124  | -2.988244 | 1.271049  |
| H | 0.554124  | -2.988244 | -1.271049 |
| H | -1.107333 | -2.352062 | 1.227948  |
| H | -1.107333 | -2.352062 | -1.227948 |
| H | -1.617665 | 1.926091  | -1.233485 |
| H | -1.617665 | 1.926091  | 1.233485  |

| <b>1S-Pr</b>              |           |           |           | <b>E = -271.4690108</b>    |           |           |           |
|---------------------------|-----------|-----------|-----------|----------------------------|-----------|-----------|-----------|
| C                         | 0.332022  | -0.825669 | 0.668596  | C                          | -0.865048 | -1.944962 | -0.674414 |
| C                         | 0.332022  | -0.825669 | -0.668596 | C                          | 0.747608  | 0.320770  | -1.174594 |
| C                         | 0.085988  | -2.327930 | 0.790743  | C                          | 0.747608  | 0.320770  | 1.174594  |
| C                         | 0.085988  | -2.327930 | -0.790743 | H                          | 0.965205  | 0.573808  | -2.208720 |
| C                         | 0.085988  | 0.561477  | -1.215033 | H                          | 0.965205  | 0.573808  | 2.208720  |
| C                         | 0.085988  | 0.561477  | 1.215033  | C                          | 1.580252  | 0.856948  | 0.000000  |
| H                         | 0.330862  | 0.790059  | -2.252651 | H                          | 2.587368  | 0.415660  | 0.000000  |
| H                         | 0.330862  | 0.790059  | 2.252651  | H                          | 1.691042  | 1.944454  | 0.000000  |
| S                         | 1.080009  | 1.584293  | 0.000000  | C                          | -0.865048 | 1.618821  | -0.702005 |
| C                         | -1.375412 | 0.921093  | -0.781677 | C                          | -0.865048 | 1.618821  | 0.702005  |
| C                         | -1.375412 | 0.921093  | 0.781677  | H                          | -1.656471 | 1.103184  | -1.237874 |
| H                         | -2.082589 | 0.189111  | -1.190131 | H                          | -1.656471 | 1.103184  | 1.237874  |
| H                         | -2.082589 | 0.189111  | 1.190131  | H                          | -1.428891 | -2.476666 | 1.432994  |
| H                         | 0.872523  | -2.916460 | 1.277154  | H                          | -1.428891 | -2.476666 | -1.432994 |
| H                         | 0.872523  | -2.916460 | -1.277154 | H                          | -0.444878 | 2.469218  | -1.233022 |
| H                         | -0.881306 | -2.615874 | 1.220940  | H                          | -0.444878 | 2.469218  | 1.233022  |
| H                         | -0.881306 | -2.615874 | -1.220940 | <hr/>                      |           |           |           |
| H                         | -1.651078 | 1.904995  | -1.172179 | <b>2CH<sub>2</sub>-Pr1</b> |           |           |           |
| H                         | -1.651078 | 1.904995  | 1.172179  | <b>E = -271.4690108</b>    |           |           |           |
| <hr/>                     |           |           |           | C                          | 0.473670  | -0.802010 | 0.677079  |
| <b>2CH<sub>2</sub></b>    |           |           |           | C                          | 0.473670  | -0.802010 | -0.677079 |
| <b>E = -271.4690108</b>   |           |           |           | C                          | -0.470675 | -2.060143 | 0.667892  |
| C                         | 0.000000  | 0.737032  | -0.306946 | C                          | -0.470675 | -2.060143 | -0.667892 |
| C                         | 0.000000  | -0.737032 | -0.306946 | C                          | 0.473670  | 0.630575  | -1.147226 |
| C                         | 0.000000  | 0.685287  | -1.793224 | C                          | 0.473670  | 0.630575  | 1.147226  |
| C                         | 0.000000  | -0.685287 | -1.793224 | H                          | 0.786995  | 0.851444  | -2.170824 |
| C                         | 0.000000  | -1.213160 | 0.943947  | H                          | 0.786995  | 0.851444  | 2.170824  |
| C                         | 0.000000  | 1.213160  | 0.943947  | C                          | 1.318484  | 1.248043  | 0.000000  |
| H                         | 0.000000  | -2.238853 | 1.297029  | H                          | 2.356104  | 0.900995  | 0.000000  |
| H                         | 0.000000  | 2.238853  | 1.297029  | H                          | 1.296517  | 2.343454  | 0.000000  |
| C                         | 0.000000  | 0.000000  | 1.888871  | C                          | -0.952225 | 1.184579  | -0.777472 |
| H                         | -0.877991 | 0.000000  | 2.554449  | C                          | -0.952225 | 1.184579  | 0.777472  |
| H                         | 0.877991  | 0.000000  | 2.554449  | H                          | -1.748106 | 0.562476  | -1.200528 |
| H                         | 0.000000  | 1.431112  | -2.580748 | H                          | -1.748106 | 0.562476  | 1.200528  |
| H                         | 0.000000  | -1.431112 | -2.580748 | H                          | -0.891076 | -2.695026 | 1.440748  |
| <hr/>                     |           |           |           | H                          | -0.891076 | -2.695026 | -1.440748 |
| <b>2CH<sub>2</sub>-TS</b> |           |           |           | H                          | -1.076211 | 2.196748  | -1.179131 |
| <b>E = -271.4690108</b>   |           |           |           | H                          | -1.076211 | 2.196748  | 1.179131  |
| C                         | 0.263335  | -0.898037 | 0.700437  | <hr/>                      |           |           |           |
| C                         | 0.263335  | -0.898037 | -0.700437 | <b>2CH<sub>2</sub>-Pr2</b> |           |           |           |
| C                         | -0.865048 | -1.944962 | 0.674414  | <b>E = -271.4690108</b>    |           |           |           |
| C                         | 0.210317  | -0.784826 | 0.772409  | C                          | 0.210317  | -0.784826 | 0.772409  |
| C                         | 0.210317  | -0.784826 | -0.772409 | C                          | 0.210317  | -0.784826 | -0.772409 |
| C                         | 0.210317  | 0.651119  | 1.179872  | C                          | 0.210317  | 0.651119  | 1.179872  |

|   |           |           |           |   |           |           |           |
|---|-----------|-----------|-----------|---|-----------|-----------|-----------|
| C | 0.210317  | 0.651119  | -1.179872 | H | 2.710108  | 1.208511  | 0.000000  |
| H | 0.536508  | 0.914743  | 2.188739  | H | 0.888559  | 2.784161  | 0.000000  |
| H | 0.536508  | 0.914743  | -2.188739 | C | -1.472597 | 1.119280  | -0.709932 |
| C | 1.076656  | 1.228244  | 0.000000  | C | -1.472597 | 1.119280  | 0.709932  |
| H | 2.106404  | 0.857612  | 0.000000  | H | -2.093398 | 0.394116  | -1.227412 |
| H | 1.087988  | 2.324669  | 0.000000  | H | -2.093398 | 0.394116  | 1.227412  |
| C | -1.188521 | 1.221293  | 0.784994  | H | -0.664995 | -3.033327 | 1.433589  |
| C | -1.188521 | 1.221293  | -0.784994 | H | -0.664995 | -3.033327 | -1.433589 |
| H | -1.292121 | 2.239921  | 1.176279  | H | -1.385031 | 2.071809  | -1.226227 |
| H | -1.292121 | 2.239921  | -1.176279 | H | -1.385031 | 2.071809  | 1.226227  |
| H | -2.003607 | 0.622944  | 1.201864  |   |           |           |           |
| H | -2.003607 | 0.622944  | -1.201864 |   |           |           |           |
| C | 0.344993  | -2.116795 | 0.803296  |   |           |           |           |
| C | 0.344993  | -2.116795 | -0.803296 |   |           |           |           |
| H | 0.469425  | -2.878226 | 1.567470  |   |           |           |           |
| H | 0.469425  | -2.878226 | -1.567470 |   |           |           |           |

---

**2SiH<sub>2</sub>** E = -271.4690108

---

|    |           |           |           |
|----|-----------|-----------|-----------|
| C  | 0.000000  | 0.750460  | -0.634167 |
| C  | 0.000000  | -0.750460 | -0.634167 |
| C  | 0.000000  | 0.686351  | -2.112271 |
| C  | 0.000000  | -0.686351 | -2.112271 |
| C  | 0.000000  | -1.399758 | 0.539991  |
| C  | 0.000000  | 1.399758  | 0.539991  |
| H  | 0.000000  | -2.477800 | 0.669260  |
| H  | 0.000000  | 2.477800  | 0.669260  |
| Si | 0.000000  | 0.000000  | 1.821464  |
| H  | -1.192631 | 0.000000  | 2.721031  |
| H  | 1.192631  | 0.000000  | 2.721031  |
| H  | 0.000000  | 1.430220  | -2.901855 |
| H  | 0.000000  | -1.430220 | -2.901855 |

---

**2SiH<sub>2</sub>-TS** E = -271.4690108

---

|    |           |           |           |
|----|-----------|-----------|-----------|
| C  | 0.349704  | -0.949668 | 0.703835  |
| C  | 0.349704  | -0.949668 | -0.703835 |
| C  | -0.320929 | -2.341257 | 0.672942  |
| C  | -0.320929 | -2.341257 | -0.672942 |
| C  | 0.349704  | 0.304430  | -1.325180 |
| C  | 0.349704  | 0.304430  | 1.325180  |
| H  | 0.336865  | 0.440047  | -2.403334 |
| H  | 0.336865  | 0.440047  | 2.403334  |
| Si | 1.224562  | 1.333474  | 0.000000  |

---

**2SiH<sub>2</sub>-Pr1** E = -271.4690108

---

|    |           |           |           |
|----|-----------|-----------|-----------|
| C  | 0.474279  | -0.846299 | 0.678220  |
| C  | 0.474279  | -0.846299 | -0.678220 |
| C  | 0.065777  | -2.369745 | 0.667885  |
| C  | 0.065777  | -2.369745 | -0.667885 |
| C  | 0.065777  | 0.463242  | -1.278435 |
| C  | 0.065777  | 0.463242  | 1.278435  |
| H  | 0.191708  | 0.599484  | -2.353764 |
| H  | 0.191708  | 0.599484  | 2.353764  |
| Si | 1.011018  | 1.541041  | 0.000000  |
| H  | 2.492156  | 1.446335  | 0.000000  |
| H  | 0.596343  | 2.975416  | 0.000000  |
| C  | -1.415460 | 0.731645  | -0.780484 |
| C  | -1.415460 | 0.731645  | 0.780484  |
| H  | -2.079380 | -0.046959 | -1.172724 |
| H  | -2.079380 | -0.046959 | 1.172724  |
| H  | -0.101687 | -3.112549 | 1.440270  |
| H  | -0.101687 | -3.112549 | -1.440270 |
| H  | -1.774253 | 1.688805  | -1.175781 |
| H  | -1.774253 | 1.688805  | 1.175781  |

---

**2SiH<sub>2</sub>-Pr2** E = -271.4690108

---

|    |           |           |           |
|----|-----------|-----------|-----------|
| C  | -0.018918 | -0.946626 | 0.780838  |
| C  | -0.018918 | -0.946626 | -0.780838 |
| C  | 0.160858  | -2.276308 | 0.796456  |
| C  | 0.160858  | -2.276308 | -0.796456 |
| C  | -0.018918 | 0.430779  | -1.322535 |
| C  | -0.018918 | 0.430779  | 1.322535  |
| H  | 0.149453  | 0.578943  | -2.390715 |
| H  | 0.149453  | 0.578943  | 2.390715  |
| Si | 1.202482  | 1.165801  | 0.000000  |

|   |           |           |           |
|---|-----------|-----------|-----------|
| H | 2.580313  | 0.612657  | 0.000000  |
| H | 1.234005  | 2.655086  | 0.000000  |
| C | -1.326193 | 1.114539  | -0.789346 |
| C | -1.326193 | 1.114539  | 0.789346  |
| H | -2.204388 | 0.583864  | -1.172247 |
| H | -2.204388 | 0.583864  | 1.172247  |
| H | 0.328087  | -3.032885 | 1.556396  |
| H | 0.328087  | -3.032885 | -1.556396 |
| H | -1.378664 | 2.141295  | -1.168238 |
| H | -1.378664 | 2.141295  | 1.168238  |

---

|            |           |                  |           |
|------------|-----------|------------------|-----------|
| <b>2NH</b> |           | E = -271.4690108 |           |
| C          | 0.084942  | -0.287407        | 0.720557  |
| C          | 0.084942  | -0.287407        | -0.720557 |
| C          | -0.010743 | -1.797536        | 0.678811  |
| C          | -0.010743 | -1.797536        | -0.678811 |
| C          | -0.010743 | 0.990406         | -1.152709 |
| C          | -0.010743 | 0.990406         | 1.152709  |
| H          | -0.059780 | 1.442217         | -2.134489 |
| H          | -0.059780 | 1.442217         | 2.134489  |
| N          | -0.112451 | 1.808652         | 0.000000  |
| H          | 0.292659  | 2.737632         | 0.000000  |
| H          | -0.073710 | -2.574098        | 1.432120  |
| H          | -0.073710 | -2.574098        | -1.432120 |

---

|                    |           |                  |           |
|--------------------|-----------|------------------|-----------|
| <b>anti-2NH-TS</b> |           | E = -271.4690108 |           |
| C                  | 0.352042  | -0.914165        | 0.693860  |
| C                  | 0.352042  | -0.914165        | -0.693860 |
| C                  | -0.899377 | -1.822429        | 0.671390  |
| C                  | -0.899377 | -1.822429        | -0.671390 |
| C                  | 0.815756  | 0.362919         | -1.114413 |
| C                  | 0.815756  | 0.362919         | 1.114413  |
| H                  | 1.132298  | 0.660485         | -2.109587 |
| H                  | 1.132298  | 0.660485         | 2.109587  |
| N                  | 1.565704  | 0.824177         | 0.000000  |
| H                  | 1.829209  | 1.801872         | 0.000000  |
| C                  | -0.899377 | 1.469474         | -0.705812 |
| C                  | -0.899377 | 1.469474         | 0.705812  |
| H                  | -1.669371 | 0.911984         | -1.233034 |
| H                  | -1.669371 | 0.911984         | 1.233034  |
| H                  | -1.500120 | -2.297220        | 1.439353  |
| H                  | -1.500120 | -2.297220        | -1.439353 |

|   |           |          |           |
|---|-----------|----------|-----------|
| H | -0.571634 | 2.364402 | -1.231625 |
| H | -0.571634 | 2.364402 | 1.231625  |

---

|                    |           |                  |           |
|--------------------|-----------|------------------|-----------|
| <b>syn-2NH-Pr1</b> |           | E = -271.4690108 |           |
| C                  | 0.478992  | -0.794824        | 0.677406  |
| C                  | 0.478992  | -0.794824        | -0.677406 |
| C                  | -0.449889 | -2.067415        | 0.667097  |
| C                  | -0.449889 | -2.067415        | -0.667097 |
| C                  | 0.478992  | 0.660116         | -1.109055 |
| C                  | 0.478992  | 0.660116         | 1.109055  |
| H                  | 0.853780  | 0.926047         | -2.099427 |
| H                  | 0.853780  | 0.926047         | 2.099427  |
| N                  | 1.245959  | 1.291359         | 0.000000  |
| H                  | 2.194848  | 0.907718         | 0.000000  |
| C                  | -0.950585 | 1.204436         | -0.776563 |
| C                  | -0.950585 | 1.204436         | 0.776563  |
| H                  | -1.735547 | 0.574750         | -1.207411 |
| H                  | -1.735547 | 0.574750         | 1.207411  |
| H                  | -0.859494 | -2.704903        | 1.443033  |
| H                  | -0.859494 | -2.704903        | -1.443033 |
| H                  | -1.062082 | 2.216612         | -1.175953 |
| H                  | -1.062082 | 2.216612         | 1.175953  |

---

|                    |           |                  |           |
|--------------------|-----------|------------------|-----------|
| <b>syn-2NH-Pr2</b> |           | E = -271.4690108 |           |
| C                  | 0.174411  | -0.787776        | 0.776012  |
| C                  | 0.174411  | -0.787776        | -0.776012 |
| C                  | 0.470979  | -2.096931        | 0.794738  |
| C                  | 0.470979  | -2.096931        | -0.794738 |
| C                  | 0.174411  | 0.663915         | -1.144326 |
| C                  | 0.174411  | 0.663915         | 1.144326  |
| H                  | 0.571699  | 0.967043         | -2.114731 |
| H                  | 0.571699  | 0.967043         | 2.114731  |
| N                  | 0.984099  | 1.228719         | 0.000000  |
| H                  | 1.920228  | 0.816558         | 0.000000  |
| C                  | -1.211768 | 1.257693         | -0.783461 |
| C                  | -1.211768 | 1.257693         | 0.783461  |
| H                  | -2.027936 | 0.665543         | -1.206164 |
| H                  | -2.027936 | 0.665543         | 1.206164  |
| H                  | 0.690320  | -2.839657        | 1.556041  |
| H                  | 0.690320  | -2.839657        | -1.556041 |
| H                  | -1.286741 | 2.276864         | -1.173987 |
| H                  | -1.286741 | 2.276864         | 1.173987  |



| <i>anti-2NH-Pr1</i> |           |           |           | E = -271.4690108 |  |  |  |
|---------------------|-----------|-----------|-----------|------------------|--|--|--|
| C                   | 0.505796  | -0.807233 | 0.676892  |                  |  |  |  |
| C                   | 0.505796  | -0.807233 | -0.676892 |                  |  |  |  |
| C                   | -0.477865 | -2.030998 | 0.667711  |                  |  |  |  |
| C                   | -0.477865 | -2.030998 | -0.667711 |                  |  |  |  |
| C                   | 0.505796  | 0.638876  | -1.108191 |                  |  |  |  |
| C                   | 0.505796  | 0.638876  | 1.108191  |                  |  |  |  |
| H                   | 0.878115  | 0.905128  | -2.099799 |                  |  |  |  |
| H                   | 0.878115  | 0.905128  | 2.099799  |                  |  |  |  |
| N                   | 1.335891  | 1.184564  | 0.000000  |                  |  |  |  |
| H                   | 1.275377  | 2.205008  | 0.000000  |                  |  |  |  |
| C                   | -0.945624 | 1.165241  | -0.775909 |                  |  |  |  |
| C                   | -0.945624 | 1.165241  | 0.775909  |                  |  |  |  |
| H                   | -1.728725 | 0.529341  | -1.203086 |                  |  |  |  |
| H                   | -1.728725 | 0.529341  | 1.203086  |                  |  |  |  |
| H                   | -0.912169 | -2.652083 | 1.443895  |                  |  |  |  |
| H                   | -0.912169 | -2.652083 | -1.443895 |                  |  |  |  |
| H                   | -1.079139 | 2.173819  | -1.183638 |                  |  |  |  |
| H                   | -1.079139 | 2.173819  | 1.183638  |                  |  |  |  |

| <i>anti-2NH-Pr2</i> |           |           |           | E = -271.4690108 |  |  |  |
|---------------------|-----------|-----------|-----------|------------------|--|--|--|
| C                   | 0.254903  | -0.781744 | 0.770513  |                  |  |  |  |
| C                   | 0.254903  | -0.781744 | -0.770513 |                  |  |  |  |
| C                   | 0.293105  | -2.117926 | 0.804813  |                  |  |  |  |
| C                   | 0.293105  | -2.117926 | -0.804813 |                  |  |  |  |
| C                   | 0.254903  | 0.666994  | -1.138353 |                  |  |  |  |
| C                   | 0.254903  | 0.666994  | 1.138353  |                  |  |  |  |
| H                   | 0.644539  | 0.970934  | -2.111733 |                  |  |  |  |
| H                   | 0.644539  | 0.970934  | 2.111733  |                  |  |  |  |
| N                   | 1.113892  | 1.161579  | 0.000000  |                  |  |  |  |
| H                   | 1.113173  | 2.185181  | 0.000000  |                  |  |  |  |
| C                   | -1.165778 | 1.218667  | -0.783361 |                  |  |  |  |
| C                   | -1.165778 | 1.218667  | 0.783361  |                  |  |  |  |
| H                   | -1.969652 | 0.606800  | -1.203603 |                  |  |  |  |
| H                   | -1.969652 | 0.606800  | 1.203603  |                  |  |  |  |
| H                   | 0.324519  | -2.885621 | 1.571690  |                  |  |  |  |
| H                   | 0.324519  | -2.885621 | -1.571690 |                  |  |  |  |
| H                   | -1.277423 | 2.233824  | -1.182151 |                  |  |  |  |
| H                   | -1.277423 | 2.233824  | 1.182151  |                  |  |  |  |

| <b>2PH</b> |           |           | E = -271.4690108 |  |  |
|------------|-----------|-----------|------------------|--|--|
| C          | -0.045202 | -0.628453 | 0.737130         |  |  |
| C          | -0.045202 | -0.628453 | -0.737130        |  |  |
| C          | -0.020103 | -2.119511 | 0.683542         |  |  |
| C          | -0.020103 | -2.119511 | -0.683542        |  |  |
| C          | -0.020103 | 0.571830  | -1.331381        |  |  |
| C          | -0.020103 | 0.571830  | 1.331381         |  |  |
| H          | 0.020883  | 0.797525  | -2.391642        |  |  |
| H          | 0.020883  | 0.797525  | 2.391642         |  |  |
| P          | 0.144288  | 1.862238  | 0.000000         |  |  |
| H          | -1.184484 | 2.395802  | 0.000000         |  |  |
| H          | 0.001655  | -2.905417 | 1.430070         |  |  |
| H          | 0.001655  | -2.905417 | -1.430070        |  |  |

| <i>syn-2PH-TS</i> |           |           | E = -271.4690108 |  |  |
|-------------------|-----------|-----------|------------------|--|--|
| C                 | 0.399671  | -0.944860 | 0.700269         |  |  |
| C                 | 0.399671  | -0.944860 | -0.700269        |  |  |
| C                 | -0.321897 | -2.312306 | 0.672634         |  |  |
| C                 | -0.321897 | -2.312306 | -0.672634        |  |  |
| C                 | 0.399671  | 0.327487  | -1.271839        |  |  |
| C                 | 0.399671  | 0.327487  | 1.271839         |  |  |
| H                 | 0.429413  | 0.542400  | -2.336474        |  |  |
| H                 | 0.429413  | 0.542400  | 2.336474         |  |  |
| P                 | 1.160403  | 1.473509  | 0.000000         |  |  |
| H                 | 2.477857  | 0.911504  | 0.000000         |  |  |
| C                 | -1.506163 | 1.041238  | -0.706436        |  |  |
| C                 | -1.506163 | 1.041238  | 0.706436         |  |  |
| H                 | -2.078573 | 0.282188  | -1.231523        |  |  |
| H                 | -2.078573 | 0.282188  | 1.231523         |  |  |
| H                 | -0.683974 | -2.992801 | 1.435029         |  |  |
| H                 | -0.683974 | -2.992801 | -1.435029        |  |  |
| H                 | -1.436510 | 1.991783  | -1.228116        |  |  |
| H                 | -1.436510 | 1.991783  | 1.228116         |  |  |

| <i>anti-2PH-TS</i> |           |           | E = -271.4690108 |  |  |
|--------------------|-----------|-----------|------------------|--|--|
| C                  | 0.383988  | -0.921980 | 0.700099         |  |  |
| C                  | 0.383988  | -0.921980 | -0.700099        |  |  |
| C                  | -0.320428 | -2.293858 | 0.673635         |  |  |
| C                  | -0.320428 | -2.293858 | -0.673635        |  |  |
| C                  | 0.383988  | 0.356926  | -1.265322        |  |  |

|   |           |           |           |   |           |           |           |
|---|-----------|-----------|-----------|---|-----------|-----------|-----------|
| C | 0.383988  | 0.356926  | 1.265322  | C | -0.024213 | 0.437138  | 1.280375  |
| H | 0.437223  | 0.562807  | -2.331684 | H | 0.210340  | 0.630125  | -2.329047 |
| H | 0.437223  | 0.562807  | 2.331684  | H | 0.210340  | 0.630125  | 2.329047  |
| P | 1.351798  | 1.335928  | 0.000000  | P | 1.197018  | 1.259649  | 0.000000  |
| H | 0.588121  | 2.541925  | 0.000000  | H | 2.218423  | 0.265543  | 0.000000  |
| C | -1.548207 | 1.012562  | -0.704087 | C | -1.333834 | 1.123423  | -0.785787 |
| C | -1.548207 | 1.012562  | 0.704087  | C | -1.333834 | 1.123423  | 0.785787  |
| H | -2.115027 | 0.248332  | -1.228902 | H | -2.205148 | 0.592703  | -1.182794 |
| H | -2.115027 | 0.248332  | 1.228902  | H | -2.205148 | 0.592703  | 1.182794  |
| H | -0.669568 | -2.982400 | 1.434908  | H | 0.386844  | -3.023534 | 1.547393  |
| H | -0.669568 | -2.982400 | -1.434908 | H | 0.386844  | -3.023534 | -1.547393 |
| H | -1.481230 | 1.958942  | -1.233151 | H | -1.372079 | 2.149282  | -1.168055 |
| H | -1.481230 | 1.958942  | 1.233151  | H | -1.372079 | 2.149282  | 1.168055  |

---

***syn*-2PH-Pr1**                      E = -271.4690108

---

|   |           |           |           |
|---|-----------|-----------|-----------|
| C | 0.576505  | -0.825357 | 0.677205  |
| C | 0.576505  | -0.825357 | -0.677205 |
| C | 0.098310  | -2.329368 | 0.666997  |
| C | 0.098310  | -2.329368 | -0.666997 |
| C | 0.098310  | 0.484833  | -1.230470 |
| C | 0.098310  | 0.484833  | 1.230470  |
| H | 0.252098  | 0.699492  | -2.289848 |
| H | 0.252098  | 0.699492  | 2.289848  |
| P | 0.854093  | 1.727246  | 0.000000  |
| H | 2.190203  | 1.228242  | 0.000000  |
| C | -1.410801 | 0.593177  | -0.778754 |
| C | -1.410801 | 0.593177  | 0.778754  |
| H | -1.978197 | -0.252899 | -1.182227 |
| H | -1.978197 | -0.252899 | 1.182227  |
| H | -0.089282 | -3.063571 | 1.443055  |
| H | -0.089282 | -3.063571 | -1.443055 |
| H | -1.859365 | 1.508793  | -1.177963 |
| H | -1.859365 | 1.508793  | 1.177963  |

---

***anti*-2PH-Pr1**                      E = -271.4690108

---

|   |           |           |           |
|---|-----------|-----------|-----------|
| C | 0.522112  | -0.834251 | 0.676349  |
| C | 0.522112  | -0.834251 | -0.676349 |
| C | 0.079789  | -2.346000 | 0.667853  |
| C | 0.079789  | -2.346000 | -0.667853 |
| C | 0.079789  | 0.489049  | -1.231059 |
| C | 0.079789  | 0.489049  | 1.231059  |
| H | 0.253513  | 0.690290  | -2.290036 |
| H | 0.253513  | 0.690290  | 2.290036  |
| P | 1.066397  | 1.569084  | 0.000000  |
| H | 0.174831  | 2.691884  | 0.000000  |
| C | -1.414732 | 0.664119  | -0.777692 |
| C | -1.414732 | 0.664119  | 0.777692  |
| H | -2.026047 | -0.154153 | -1.177966 |
| H | -2.026047 | -0.154153 | 1.177966  |
| H | -0.093179 | -3.085884 | 1.441659  |
| H | -0.093179 | -3.085884 | -1.441659 |
| H | -1.821432 | 1.598164  | -1.179159 |
| H | -1.821432 | 1.598164  | 1.179159  |

---

***syn*-2PH-Pr2**                      E = -271.4690108

---

|   |           |           |           |
|---|-----------|-----------|-----------|
| C | -0.024213 | -0.944549 | 0.776805  |
| C | -0.024213 | -0.944549 | -0.776805 |
| C | 0.197793  | -2.270798 | 0.788584  |
| C | 0.197793  | -2.270798 | -0.788584 |
| C | -0.024213 | 0.437138  | -1.280375 |

---

***anti*-2PH-Pr2**                      E = -271.4690108

---

|   |           |           |           |
|---|-----------|-----------|-----------|
| C | -0.137327 | -0.938417 | 0.776486  |
| C | -0.137327 | -0.938417 | -0.776486 |
| C | -0.137327 | -2.279498 | 0.796092  |
| C | -0.137327 | -2.279498 | -0.796092 |
| C | 0.051085  | 0.440571  | -1.275526 |

|              |                  |           |           |               |           |                  |           |
|--------------|------------------|-----------|-----------|---------------|-----------|------------------|-----------|
| C            | 0.051085         | 0.440571  | 1.275526  | H             | -1.481819 | -2.312396        | 1.441097  |
| H            | 0.310524         | 0.592567  | -2.325165 | H             | -1.481819 | -2.312396        | -1.441097 |
| H            | 0.310524         | 0.592567  | 2.325165  | H             | -0.498754 | 2.388860         | -1.227728 |
| P            | 1.437382         | 0.961545  | 0.000000  | H             | -0.498754 | 2.388860         | 1.227728  |
| H            | 1.130789         | 2.359497  | 0.000000  | <hr/>         |           |                  |           |
| C            | -1.172754        | 1.267327  | -0.784825 | <b>2O-Pr1</b> |           | E = -271.4690108 |           |
| C            | -1.172754        | 1.267327  | 0.784825  | <hr/>         |           |                  |           |
| H            | -2.101496        | 0.838560  | -1.178330 | C             | 0.502577  | -0.802172        | 0.676768  |
| H            | -2.101496        | 0.838560  | 1.178330  | C             | 0.502577  | -0.802172        | -0.676768 |
| H            | -0.079028        | -3.051826 | 1.556360  | C             | -0.462774 | -2.044183        | 0.667040  |
| H            | -0.079028        | -3.051826 | -1.556360 | C             | -0.462774 | -2.044183        | -0.667040 |
| H            | -1.097829        | 2.289465  | -1.170811 | C             | 0.502577  | 0.654199         | -1.085324 |
| H            | -1.097829        | 2.289465  | 1.170811  | C             | 0.502577  | 0.654199         | 1.085324  |
| <hr/>        |                  |           |           | H             | 0.933585  | 0.956998         | -2.040026 |
| <b>2O</b>    | E = -271.4690108 |           |           | H             | 0.933585  | 0.956998         | 2.040026  |
| <hr/>        |                  |           |           | O             | 1.266606  | 1.216822         | 0.000000  |
| C            | 0.000000         | 0.723282  | -0.274918 | C             | -0.934749 | 1.201553         | -0.775874 |
| C            | 0.000000         | -0.723282 | -0.274918 | C             | -0.934749 | 1.201553         | 0.775874  |
| C            | 0.000000         | 0.679412  | -1.782979 | H             | -1.721352 | 0.575557         | -1.209251 |
| C            | 0.000000         | -0.679412 | -1.782979 | H             | -1.721352 | 0.575557         | 1.209251  |
| C            | 0.000000         | -1.123262 | 1.005224  | H             | -0.885455 | -2.669801        | 1.445417  |
| C            | 0.000000         | 1.123262  | 1.005224  | H             | -0.885455 | -2.669801        | -1.445417 |
| H            | 0.000000         | -2.067594 | 1.528476  | H             | -1.038990 | 2.213576         | -1.177669 |
| H            | 0.000000         | 2.067594  | 1.528476  | H             | -1.038990 | 2.213576         | 1.177669  |
| O            | 0.000000         | 0.000000  | 1.836823  | <hr/>         |           |                  |           |
| H            | 0.000000         | 1.434510  | -2.559732 | <b>2O-Pr2</b> |           | E = -271.4690108 |           |
| H            | 0.000000         | -1.434510 | -2.559732 | <hr/>         |           |                  |           |
| <hr/>        |                  |           |           | C             | 0.222281  | -0.783026        | 0.773728  |
| <b>2O-TS</b> | E = -271.4690108 |           |           | C             | 0.222281  | -0.783026        | -0.773728 |
| <hr/>        |                  |           |           | C             | 0.390421  | -2.110833        | 0.799573  |
| C            | 0.351091         | -0.912525 | 0.696542  | C             | 0.390421  | -2.110833        | -0.799573 |
| C            | 0.351091         | -0.912525 | -0.696542 | C             | 0.222281  | 0.671718         | -1.117179 |
| C            | -0.885997        | -1.835231 | 0.671547  | C             | 0.222281  | 0.671718         | 1.117179  |
| C            | -0.885997        | -1.835231 | -0.671547 | H             | 0.674224  | 1.006972         | -2.050554 |
| C            | 0.817143         | 0.358599  | -1.090948 | H             | 0.674224  | 1.006972         | 2.050554  |
| C            | 0.817143         | 0.358599  | 1.090948  | O             | 1.025572  | 1.177595         | 0.000000  |
| H            | 1.195760         | 0.693409  | -2.049720 | C             | -1.175650 | 1.258245         | -0.782501 |
| H            | 1.195760         | 0.693409  | 2.049720  | C             | -1.175650 | 1.258245         | 0.782501  |
| O            | 1.517036         | 0.866922  | 0.000000  | H             | -1.988648 | 0.661987         | -1.206490 |
| C            | -0.885997        | 1.520013  | -0.702043 | H             | -1.988648 | 0.661987         | 1.206490  |
| C            | -0.885997        | 1.520013  | 0.702043  | H             | 0.509139  | -2.871642        | 1.564494  |
| H            | -1.660770        | 0.977306  | -1.237152 | H             | 0.509139  | -2.871642        | -1.564494 |
| H            | -1.660770        | 0.977306  | 1.237152  | H             | -1.253003 | 2.275683         | -1.177170 |
| <hr/>        |                  |           |           | H             | -1.253003 | 2.275683         | 1.177170  |

| <b>2S</b> |          |           |                  |
|-----------|----------|-----------|------------------|
|           |          |           | E = -271.4690108 |
| C         | 0.000000 | 0.723396  | -0.614815        |
| C         | 0.000000 | -0.723396 | -0.614815        |
| C         | 0.000000 | 0.679453  | -2.123558        |
| C         | 0.000000 | -0.679453 | -2.123558        |
| C         | 0.000000 | -1.286234 | 0.604610         |
| C         | 0.000000 | 1.286234  | 0.604610         |
| H         | 0.000000 | -2.321711 | 0.919184         |
| H         | 0.000000 | 2.321711  | 0.919184         |
| S         | 0.000000 | 0.000000  | 1.848284         |
| H         | 0.000000 | 1.431920  | -2.902879        |
| H         | 0.000000 | -1.431920 | -2.902879        |

|   |           |           |           |
|---|-----------|-----------|-----------|
| H | 0.297947  | 0.771371  | -2.244405 |
| H | 0.297947  | 0.771371  | 2.244405  |
| S | 0.901527  | 1.674467  | 0.000000  |
| C | -1.405307 | 0.573891  | -0.777489 |
| C | -1.405307 | 0.573891  | 0.777489  |
| H | -1.954504 | -0.284024 | -1.184518 |
| H | -1.954504 | -0.284024 | 1.184518  |
| H | -0.087867 | -3.043354 | 1.445593  |
| H | -0.087867 | -3.043354 | -1.445593 |
| H | -1.861359 | 1.484161  | -1.176759 |
| H | -1.861359 | 1.484161  | 1.176759  |

| <b>2S-TS</b> |           |           |                  |
|--------------|-----------|-----------|------------------|
|              |           |           | E = -271.4690108 |
| C            | 0.448017  | -0.930649 | 0.696212         |
| C            | 0.448017  | -0.930649 | -0.696212        |
| C            | -0.415578 | -2.213530 | 0.671402         |
| C            | -0.415578 | -2.213530 | -0.671402        |
| C            | 0.448017  | 0.372960  | -1.228541        |
| C            | 0.448017  | 0.372960  | 1.228541         |
| H            | 0.551838  | 0.648396  | -2.273736        |
| H            | 0.551838  | 0.648396  | 2.273736         |
| S            | 1.253519  | 1.414847  | 0.000000         |
| C            | -1.515432 | 0.918174  | -0.705370        |
| C            | -1.515432 | 0.918174  | 0.705370         |
| H            | -2.065868 | 0.139363  | -1.227419        |
| H            | -2.065868 | 0.139363  | 1.227419         |
| H            | -0.829732 | -2.856292 | 1.439869         |
| H            | -0.829732 | -2.856292 | -1.439869        |
| H            | -1.474533 | 1.868025  | -1.230141        |
| H            | -1.474533 | 1.868025  | 1.230141         |

| <b>2S-Pr2</b> |           |           |                  |
|---------------|-----------|-----------|------------------|
|               |           |           | E = -271.4690108 |
| C             | -0.144816 | -0.929535 | 0.775890         |
| C             | -0.144816 | -0.929535 | -0.775890        |
| C             | -0.144816 | -2.272832 | 0.788193         |
| C             | -0.144816 | -2.272832 | -0.788193        |
| C             | 0.052985  | 0.450650  | -1.254988        |
| C             | 0.052985  | 0.450650  | 1.254988         |
| H             | 0.377118  | 0.628939  | -2.281164        |
| H             | 0.377118  | 0.628939  | 2.281164         |
| S             | 1.396429  | 0.984902  | 0.000000         |
| C             | -1.150675 | 1.305449  | -0.783266        |
| C             | -1.150675 | 1.305449  | 0.783266         |
| H             | -2.083309 | 0.892335  | -1.184390        |
| H             | -2.083309 | 0.892335  | 1.184390         |
| H             | -0.099996 | -3.046794 | 1.547491         |
| H             | -0.099996 | -3.046794 | -1.547491        |
| H             | -1.041313 | 2.323913  | -1.167575        |
| H             | -1.041313 | 2.323913  | 1.167575         |

| <b>2S-Pr1</b> |          |           |                  |
|---------------|----------|-----------|------------------|
|               |          |           | E = -271.4690108 |
| C             | 0.600366 | -0.817348 | 0.676542         |
| C             | 0.600366 | -0.817348 | -0.676542        |
| C             | 0.101934 | -2.313091 | 0.666714         |
| C             | 0.101934 | -2.313091 | -0.666714        |
| C             | 0.101934 | 0.502567  | -1.205640        |
| C             | 0.101934 | 0.502567  | 1.205640         |

| <b>3CH<sub>2</sub></b> |          |           |                  |
|------------------------|----------|-----------|------------------|
|                        |          |           | E = -271.4690108 |
| C                      | 0.000000 | 0.741929  | 0.254105         |
| C                      | 0.000000 | -0.741929 | 0.254105         |
| C                      | 0.000000 | 1.441900  | -1.007729        |
| C                      | 0.000000 | -1.441900 | -1.007729        |
| C                      | 0.000000 | -1.186251 | 1.541657         |
| C                      | 0.000000 | 1.186251  | 1.541657         |
| H                      | 0.000000 | -2.217209 | 1.876528         |
| H                      | 0.000000 | 2.217209  | 1.876528         |

|   |           |           |           |   |           |           |           |
|---|-----------|-----------|-----------|---|-----------|-----------|-----------|
| C | 0.000000  | 0.000000  | 2.462807  | H | -0.704571 | -1.327622 | -2.164412 |
| H | -0.876262 | 0.000000  | 3.131735  | H | -0.704571 | -1.327622 | 2.164412  |
| H | 0.876262  | 0.000000  | 3.131735  | C | -1.285539 | -1.691091 | 0.000000  |
| H | 0.000000  | 2.529109  | -1.020343 | H | -2.273661 | -1.219765 | 0.000000  |
| H | 0.000000  | -2.529109 | -1.020343 | H | -1.401465 | -2.781821 | 0.000000  |
| C | 0.000000  | 0.725954  | -2.163727 | C | 0.967463  | -1.910526 | -0.781750 |
| C | 0.000000  | -0.725954 | -2.163727 | C | 0.967463  | -1.910526 | 0.781750  |
| H | 0.000000  | 1.238981  | -3.122175 | H | 1.839076  | -1.403877 | -1.206152 |
| H | 0.000000  | -1.238981 | -3.122175 | H | 1.839076  | -1.403877 | 1.206152  |

---

**3CH<sub>2</sub>-TS** E = -271.4690108

---

|   |           |           |           |
|---|-----------|-----------|-----------|
| C | -0.401406 | 0.291689  | 0.725038  |
| C | -0.401406 | 0.291689  | -0.725038 |
| C | -0.019656 | 1.470582  | 1.428965  |
| C | -0.019656 | 1.470582  | -1.428965 |
| C | -0.733793 | -0.991511 | -1.171166 |
| C | -0.733793 | -0.991511 | 1.171166  |
| H | -0.925201 | -1.258335 | -2.205350 |
| H | -0.925201 | -1.258335 | 2.205350  |
| C | -1.326351 | -1.727986 | 0.000000  |
| H | -2.413765 | -1.521955 | 0.000000  |
| H | -1.204010 | -2.812879 | 0.000000  |
| C | 1.354377  | -2.050376 | -0.686583 |
| C | 1.354377  | -2.050376 | 0.686583  |
| H | 1.917493  | -1.311578 | -1.245721 |
| H | 1.917493  | -1.311578 | 1.245721  |
| H | -0.015250 | 1.479257  | 2.516378  |
| H | -0.015250 | 1.479257  | -2.516378 |
| H | 1.046224  | -2.928783 | -1.246018 |
| H | 1.046224  | -2.928783 | 1.246018  |
| C | 0.327091  | 2.591002  | 0.715818  |
| C | 0.327091  | 2.591002  | -0.715818 |
| H | 0.604999  | 3.502497  | 1.238863  |
| H | 0.604999  | 3.502497  | -1.238863 |

---

**3CH<sub>2</sub>-Pr** E = -271.4690108

---

|   |           |           |           |
|---|-----------|-----------|-----------|
| C | -0.195437 | 0.271897  | 0.704529  |
| C | -0.195437 | 0.271897  | -0.704529 |
| C | -0.009675 | 1.450120  | 1.414579  |
| C | -0.009675 | 1.450120  | -1.414579 |
| C | -0.364745 | -1.173257 | -1.137119 |
| C | -0.364745 | -1.173257 | 1.137119  |

|   |           |           |           |
|---|-----------|-----------|-----------|
| H | -0.004444 | 1.456481  | 2.502295  |
| H | -0.004444 | 1.456481  | -2.502295 |
| H | 0.951593  | -2.932255 | -1.177786 |
| H | 0.951593  | -2.932255 | 1.177786  |
| C | 0.157193  | 2.645120  | 0.698059  |
| C | 0.157193  | 2.645120  | -0.698059 |
| H | 0.283739  | 3.581215  | 1.236018  |
| H | 0.283739  | 3.581215  | -1.236018 |

---

**3SiH<sub>2</sub>** E = -271.4690108

---

|    |           |           |           |
|----|-----------|-----------|-----------|
| C  | 0.000000  | 0.754282  | -0.073872 |
| C  | 0.000000  | -0.754282 | -0.073872 |
| C  | 0.000000  | 1.432898  | -1.359809 |
| C  | 0.000000  | -1.432898 | -1.359809 |
| C  | 0.000000  | -1.354788 | 1.149535  |
| C  | 0.000000  | 1.354788  | 1.149535  |
| H  | 0.000000  | -2.435263 | 1.254382  |
| H  | 0.000000  | 2.435263  | 1.254382  |
| Si | 0.000000  | 0.000000  | 2.438374  |
| H  | -1.203531 | 0.000000  | 3.317977  |
| H  | 1.203531  | 0.000000  | 3.317977  |
| H  | 0.000000  | 2.520034  | -1.367268 |
| H  | 0.000000  | -2.520034 | -1.367268 |
| C  | 0.000000  | 0.727397  | -2.516105 |
| C  | 0.000000  | -0.727397 | -2.516105 |
| H  | 0.000000  | 1.244351  | -3.472202 |
| H  | 0.000000  | -1.244351 | -3.472202 |

---

**3SiH<sub>2</sub>-TS** E = -271.4690108

---

|   |           |          |           |
|---|-----------|----------|-----------|
| C | -0.291228 | 0.467698 | 0.732431  |
| C | -0.291228 | 0.467698 | -0.732431 |
| C | -0.052712 | 1.703413 | 1.418506  |
| C | -0.052712 | 1.703413 | -1.418506 |

|    |           |           |           |
|----|-----------|-----------|-----------|
| C  | -0.435797 | -0.794089 | -1.324245 |
| C  | -0.435797 | -0.794089 | 1.324245  |
| H  | -0.457755 | -0.894745 | -2.405873 |
| H  | -0.457755 | -0.894745 | 2.405873  |
| Si | -1.142140 | -1.903343 | 0.000000  |
| H  | -2.636227 | -1.831860 | 0.000000  |
| H  | -0.764024 | -3.340365 | 0.000000  |
| C  | 1.675565  | -1.751841 | -0.689722 |
| C  | 1.675565  | -1.751841 | 0.689722  |
| H  | 2.155038  | -0.953535 | -1.243518 |
| H  | 2.155038  | -0.953535 | 1.243518  |
| H  | -0.048795 | 1.707022  | 2.505994  |
| H  | -0.048795 | 1.707022  | -2.505994 |
| H  | 1.487293  | -2.664697 | -1.246057 |
| H  | 1.487293  | -2.664697 | 1.246057  |
| C  | 0.146339  | 2.861068  | 0.715948  |
| C  | 0.146339  | 2.861068  | -0.715948 |
| H  | 0.306323  | 3.797973  | 1.243325  |
| H  | 0.306323  | 3.797973  | -1.243325 |

| <b>3NH</b> |          |           | E = -271.4690108 |
|------------|----------|-----------|------------------|
| C          | 0.000000 | 0.726111  | 0.251082         |
| C          | 0.000000 | -0.726111 | 0.251082         |
| C          | 0.000000 | 1.431176  | -0.984498        |
| C          | 0.000000 | -1.431176 | -0.984498        |
| C          | 0.000000 | -1.134851 | 1.583881         |
| C          | 0.000000 | 1.134851  | 1.583881         |
| H          | 0.000000 | -2.117153 | 2.032363         |
| H          | 0.000000 | 2.117153  | 2.032363         |
| N          | 0.000000 | 0.000000  | 2.350549         |
| H          | 0.000000 | 0.000000  | 3.360230         |
| H          | 0.000000 | 2.518432  | -0.995864        |
| H          | 0.000000 | -2.518432 | -0.995864        |
| C          | 0.000000 | 0.715217  | -2.156256        |
| C          | 0.000000 | -0.715217 | -2.156256        |
| H          | 0.000000 | 1.238813  | -3.108788        |
| H          | 0.000000 | -1.238813 | -3.108788        |

| <b>3SiH<sub>2</sub>-Pr</b> |           |           | E = -271.4690108 |
|----------------------------|-----------|-----------|------------------|
| C                          | -0.008899 | 0.435907  | 0.708337         |
| C                          | -0.008899 | 0.435907  | -0.708337        |
| C                          | -0.002593 | 1.640755  | 1.407287         |
| C                          | -0.002593 | 1.640755  | -1.407287        |
| C                          | -0.021925 | -0.975392 | -1.258672        |
| C                          | -0.021925 | -0.975392 | 1.258672         |
| H                          | -0.181553 | -1.039409 | -2.336681        |
| H                          | -0.181553 | -1.039409 | 2.336681         |
| Si                         | -1.266311 | -1.717145 | 0.000000         |
| H                          | -2.620076 | -1.104283 | 0.000000         |
| H                          | -1.383125 | -3.206973 | 0.000000         |
| C                          | 1.293277  | -1.678172 | -0.783610        |
| C                          | 1.293277  | -1.678172 | 0.783610         |
| H                          | 2.166087  | -1.144248 | -1.176059        |
| H                          | 2.166087  | -1.144248 | 1.176059         |
| H                          | -0.005471 | 1.643930  | 2.495068         |
| H                          | -0.005471 | 1.643930  | -2.495068        |
| H                          | 1.337483  | -2.701098 | -1.174481        |
| H                          | 1.337483  | -2.701098 | 1.174481         |
| C                          | -0.001086 | 2.847889  | 0.698123         |
| C                          | -0.001086 | 2.847889  | -0.698123        |
| H                          | -0.003417 | 3.790553  | 1.239337         |
| H                          | -0.003417 | 3.790553  | -1.239337        |

| <b>anti-3NH-TS</b> |           |           | E = -271.4690108 |
|--------------------|-----------|-----------|------------------|
| C                  | -0.393199 | 0.272049  | 0.712193         |
| C                  | -0.393199 | 0.272049  | -0.712193        |
| C                  | -0.042026 | 1.432304  | 1.423317         |
| C                  | -0.042026 | 1.432304  | -1.423317        |
| C                  | -0.699623 | -1.073535 | -1.113463        |
| C                  | -0.699623 | -1.073535 | 1.113463         |
| H                  | -0.997030 | -1.391325 | -2.105784        |
| H                  | -0.997030 | -1.391325 | 2.105784         |
| N                  | -1.282537 | -1.668875 | 0.000000         |
| H                  | -1.412040 | -2.673214 | 0.000000         |
| C                  | 1.298877  | -1.923424 | -0.699092        |
| C                  | 1.298877  | -1.923424 | 0.699092         |
| H                  | 1.894370  | -1.198031 | -1.243787        |
| H                  | 1.894370  | -1.198031 | 1.243787         |
| H                  | -0.033393 | 1.438408  | 2.510561         |
| H                  | -0.033393 | 1.438408  | -2.510561        |
| H                  | 1.118492  | -2.851218 | -1.238001        |
| H                  | 1.118492  | -2.851218 | 1.238001         |
| C                  | 0.281975  | 2.574499  | 0.706942         |
| C                  | 0.281975  | 2.574499  | -0.706942        |
| H                  | 0.536434  | 3.488472  | 1.237251         |
| H                  | 0.536434  | 3.488472  | -1.237251        |

| <i>syn</i> -3NH-Pr |           |           |                  |
|--------------------|-----------|-----------|------------------|
|                    |           |           | E = -271.4690108 |
| C                  | -0.196694 | 0.271384  | 0.703674         |
| C                  | -0.196694 | 0.271384  | -0.703674        |
| C                  | 0.002019  | 1.444824  | 1.416313         |
| C                  | 0.002019  | 1.444824  | -1.416313        |
| C                  | -0.388762 | -1.188111 | -1.101315        |
| C                  | -0.388762 | -1.188111 | 1.101315         |
| H                  | -0.794993 | -1.376979 | -2.097373        |
| H                  | -0.794993 | -1.376979 | 2.097373         |
| N                  | -1.236861 | -1.728526 | 0.000000         |
| H                  | -2.133217 | -1.235154 | 0.000000         |
| C                  | 0.940676  | -1.934343 | -0.780716        |
| C                  | 0.940676  | -1.934343 | 0.780716         |
| H                  | 1.809098  | -1.429948 | -1.212817        |
| H                  | 1.809098  | -1.429948 | 1.212817         |
| H                  | 0.014443  | 1.451557  | 2.503981         |
| H                  | 0.014443  | 1.451557  | -2.503981        |
| H                  | 0.899076  | -2.953720 | -1.174496        |
| H                  | 0.899076  | -2.953720 | 1.174496         |
| C                  | 0.171067  | 2.639650  | 0.697978         |
| C                  | 0.171067  | 2.639650  | -0.697978        |
| H                  | 0.298167  | 3.576083  | 1.235197         |
| H                  | 0.298167  | 3.576083  | -1.235197        |

|   |          |          |           |
|---|----------|----------|-----------|
| C | 0.166101 | 2.636879 | 0.698088  |
| C | 0.166101 | 2.636879 | -0.698088 |
| H | 0.305364 | 3.571496 | 1.235187  |
| H | 0.305364 | 3.571496 | -1.235187 |

| <b>3PH</b> |           |           |                  |
|------------|-----------|-----------|------------------|
|            |           |           | E = -271.4690108 |
| C          | -0.028672 | -0.068973 | 0.739541         |
| C          | -0.028672 | -0.068973 | -0.739541        |
| C          | -0.007560 | -1.334927 | 1.430629         |
| C          | -0.007560 | -1.334927 | -1.430629        |
| C          | -0.064343 | 1.188229  | -1.292028        |
| C          | -0.064343 | 1.188229  | 1.292028         |
| H          | -0.044871 | 1.396040  | -2.355649        |
| H          | -0.044871 | 1.396040  | 2.355649         |
| P          | 0.163102  | 2.413499  | 0.000000         |
| H          | -1.053461 | 3.147950  | 0.000000         |
| H          | -0.000664 | -1.341354 | 2.517565         |
| H          | -0.000664 | -1.341354 | -2.517565        |
| C          | -0.007560 | -2.497368 | 0.722436         |
| C          | -0.007560 | -2.497368 | -0.722436        |
| H          | -0.002192 | -3.451671 | 1.242564         |
| H          | -0.002192 | -3.451671 | -1.242564        |

| <i>anti</i> -3NH-Pr |           |           |                  |
|---------------------|-----------|-----------|------------------|
|                     |           |           | E = -271.4690108 |
| C                   | -0.219085 | 0.274735  | 0.702457         |
| C                   | -0.219085 | 0.274735  | -0.702457        |
| C                   | -0.017233 | 1.445233  | 1.417008         |
| C                   | -0.017233 | 1.445233  | -1.417008        |
| C                   | -0.395663 | -1.177602 | -1.101248        |
| C                   | -0.395663 | -1.177602 | 1.101248         |
| H                   | -0.799912 | -1.365887 | -2.097981        |
| H                   | -0.799912 | -1.365887 | 2.097981         |
| N                   | -1.297631 | -1.622376 | 0.000000         |
| H                   | -1.352072 | -2.645183 | 0.000000         |
| C                   | 0.958347  | -1.903095 | -0.780342        |
| C                   | 0.958347  | -1.903095 | 0.780342         |
| H                   | 1.823803  | -1.390031 | -1.210085        |
| H                   | 1.823803  | -1.390031 | 1.210085         |
| H                   | -0.010333 | 1.451750  | 2.504397         |
| H                   | -0.010333 | 1.451750  | -2.504397        |
| H                   | 0.944012  | -2.923315 | -1.181067        |
| H                   | 0.944012  | -2.923315 | 1.181067         |

| <i>syn</i> -3PH-TS |           |           |                  |
|--------------------|-----------|-----------|------------------|
|                    |           |           | E = -271.4690108 |
| C                  | -0.308679 | 0.452833  | 0.723758         |
| C                  | -0.308679 | 0.452833  | -0.723758        |
| C                  | -0.066367 | 1.674323  | 1.420754         |
| C                  | -0.066367 | 1.674323  | -1.420754        |
| C                  | -0.460582 | -0.831906 | -1.264138        |
| C                  | -0.460582 | -0.831906 | 1.264138         |
| H                  | -0.540386 | -1.014116 | -2.331780        |
| H                  | -0.540386 | -1.014116 | 2.331780         |
| P                  | -1.084081 | -2.008570 | 0.000000         |
| H                  | -2.422766 | -1.484131 | 0.000000         |
| C                  | 1.695452  | -1.661697 | -0.690337        |
| C                  | 1.695452  | -1.661697 | 0.690337         |
| H                  | 2.156389  | -0.851566 | -1.243507        |
| H                  | 2.156389  | -0.851566 | 1.243507         |
| H                  | -0.060707 | 1.677858  | 2.508020         |
| H                  | -0.060707 | 1.677858  | -2.508020        |
| H                  | 1.541078  | -2.582997 | -1.243038        |
| H                  | 1.541078  | -2.582997 | 1.243038         |

|   |          |          |           |
|---|----------|----------|-----------|
| C | 0.132624 | 2.834096 | 0.714210  |
| C | 0.132624 | 2.834096 | -0.714210 |
| H | 0.290933 | 3.771263 | 1.241478  |
| H | 0.290933 | 3.771263 | -1.241478 |

---

**anti-3PH-TS** E = -271.4690108

---

|   |           |           |           |
|---|-----------|-----------|-----------|
| C | -0.298611 | 0.426015  | 0.722610  |
| C | -0.298611 | 0.426015  | -0.722610 |
| C | -0.080935 | 1.646694  | 1.419345  |
| C | -0.080935 | 1.646694  | -1.419345 |
| C | -0.418988 | -0.877854 | -1.260758 |
| C | -0.418988 | -0.877854 | 1.260758  |
| H | -0.524328 | -1.049464 | -2.328227 |
| H | -0.524328 | -1.049464 | 2.328227  |
| P | -1.274319 | -1.855135 | 0.000000  |
| H | -0.601888 | -3.106044 | 0.000000  |
| C | 1.749339  | -1.600954 | -0.689907 |
| C | 1.749339  | -1.600954 | 0.689907  |
| H | 2.203860  | -0.786051 | -1.242455 |
| H | 2.203860  | -0.786051 | 1.242455  |
| H | -0.080093 | 1.651068  | 2.506592  |
| H | -0.080093 | 1.651068  | -2.506592 |
| H | 1.615214  | -2.523219 | -1.246148 |
| H | 1.615214  | -2.523219 | 1.246148  |
| C | 0.112751  | 2.810447  | 0.712146  |
| C | 0.112751  | 2.810447  | -0.712146 |
| H | 0.262349  | 3.748108  | 1.240996  |
| H | 0.262349  | 3.748108  | -1.240996 |

---

**syn-3PH-Pr** E = -271.4690108

---

|   |           |           |           |
|---|-----------|-----------|-----------|
| C | -0.049508 | 0.443593  | 0.705390  |
| C | -0.049508 | 0.443593  | -0.705390 |
| C | -0.013847 | 1.639274  | 1.410037  |
| C | -0.013847 | 1.639274  | -1.410037 |
| C | -0.053260 | -0.980310 | -1.214856 |
| C | -0.053260 | -0.980310 | 1.214856  |
| H | -0.275087 | -1.099105 | -2.277509 |
| H | -0.275087 | -1.099105 | 2.277509  |
| P | -1.223632 | -1.878964 | 0.000000  |
| H | -2.285464 | -0.926840 | 0.000000  |

|   |           |           |           |
|---|-----------|-----------|-----------|
| C | 1.299487  | -1.630295 | -0.782175 |
| C | 1.299487  | -1.630295 | 0.782175  |
| H | 2.139417  | -1.057419 | -1.188325 |
| H | 2.139417  | -1.057419 | 1.188325  |
| H | -0.010815 | 1.643858  | 2.497661  |
| H | -0.010815 | 1.643858  | -2.497661 |
| H | 1.375346  | -2.649565 | -1.175448 |
| H | 1.375346  | -2.649565 | 1.175448  |
| C | -0.001435 | 2.848796  | 0.696825  |
| C | -0.001435 | 2.848796  | -0.696825 |
| H | 0.002486  | 3.791535  | 1.237750  |
| H | 0.002486  | 3.791535  | -1.237750 |

---

**anti-3PH-Pr** E = -271.4690108

---

|   |           |           |           |
|---|-----------|-----------|-----------|
| C | -0.042923 | 0.439312  | 0.705574  |
| C | -0.042923 | 0.439312  | -0.705574 |
| C | -0.015028 | 1.637137  | 1.410729  |
| C | -0.015028 | 1.637137  | -1.410729 |
| C | -0.044500 | -0.988781 | -1.214895 |
| C | -0.044500 | -0.988781 | 1.214895  |
| H | -0.272958 | -1.096979 | -2.277224 |
| H | -0.272958 | -1.096979 | 2.277224  |
| P | -1.332075 | -1.705823 | 0.000000  |
| H | -0.887345 | -3.070307 | 0.000000  |
| C | 1.299447  | -1.642470 | -0.780743 |
| C | 1.299447  | -1.642470 | 0.780743  |
| H | 2.146920  | -1.075301 | -1.183098 |
| H | 2.146920  | -1.075301 | 1.183098  |
| H | -0.016463 | 1.641174  | 2.498209  |
| H | -0.016463 | 1.641174  | -2.498209 |
| H | 1.370043  | -2.660842 | -1.176665 |
| H | 1.370043  | -2.660842 | 1.176665  |
| C | 0.002427  | 2.843738  | 0.697947  |
| C | 0.002427  | 2.843738  | -0.697947 |
| H | 0.010155  | 3.787161  | 1.237563  |
| H | 0.010155  | 3.787161  | -1.237563 |

---

**3O** E = -271.4690108

---

|   |          |           |          |
|---|----------|-----------|----------|
| C | 0.000000 | 0.727741  | 0.265606 |
| C | 0.000000 | -0.727741 | 0.265606 |



|   |          |           |           |
|---|----------|-----------|-----------|
| C | 0.000000 | 1.438213  | -0.974300 |
| C | 0.000000 | -1.438213 | -0.974300 |
| C | 0.000000 | -1.103808 | 1.589079  |
| C | 0.000000 | 1.103808  | 1.589079  |
| H | 0.000000 | -2.052338 | 2.103055  |
| H | 0.000000 | 2.052338  | 2.103055  |
| O | 0.000000 | 0.000000  | 2.380302  |
| H | 0.000000 | 2.524651  | -0.985817 |
| H | 0.000000 | -2.524651 | -0.985817 |
| C | 0.000000 | 0.719145  | -2.138001 |
| C | 0.000000 | -0.719145 | -2.138001 |
| H | 0.000000 | 1.238051  | -3.092748 |
| H | 0.000000 | -1.238051 | -3.092748 |

---

**3O-TS** E = -271.4690108

---

|   |           |           |           |
|---|-----------|-----------|-----------|
| C | -0.402378 | 0.279549  | 0.713319  |
| C | -0.402378 | 0.279549  | -0.713319 |
| C | -0.024507 | 1.435556  | 1.427636  |
| C | -0.024507 | 1.435556  | -1.427636 |
| C | -0.732692 | -1.050715 | -1.088915 |
| C | -0.732692 | -1.050715 | 1.088915  |
| H | -1.078535 | -1.420742 | -2.044821 |
| H | -1.078535 | -1.420742 | 2.044821  |
| O | -1.253935 | -1.687330 | 0.000000  |
| C | 1.279567  | -1.992705 | -0.693321 |
| C | 1.279567  | -1.992705 | 0.693321  |
| H | 1.885527  | -1.282045 | -1.245943 |
| H | 1.885527  | -1.282045 | 1.245943  |
| H | -0.013414 | 1.441112  | 2.514445  |
| H | -0.013414 | 1.441112  | -2.514445 |
| H | 1.010397  | -2.894267 | -1.236101 |
| H | 1.010397  | -2.894267 | 1.236101  |
| C | 0.317150  | 2.566373  | 0.709725  |
| C | 0.317150  | 2.566373  | -0.709725 |
| H | 0.588921  | 3.476914  | 1.236995  |
| H | 0.588921  | 3.476914  | -1.236995 |

---

**3O-Pr** E = -271.4690108

---

|   |           |          |           |
|---|-----------|----------|-----------|
| C | -0.212177 | 0.275068 | 0.702141  |
| C | -0.212177 | 0.275068 | -0.702141 |

|   |           |           |           |
|---|-----------|-----------|-----------|
| C | -0.004763 | 1.443566  | 1.417888  |
| C | -0.004763 | 1.443566  | -1.417888 |
| C | -0.407076 | -1.184027 | -1.079113 |
| C | -0.407076 | -1.184027 | 1.079113  |
| H | -0.873986 | -1.398352 | -2.041045 |
| H | -0.873986 | -1.398352 | 2.041045  |
| O | -1.247073 | -1.649921 | 0.000000  |
| C | 0.923770  | -1.939677 | -0.779939 |
| C | 0.923770  | -1.939677 | 0.779939  |
| H | 1.796370  | -1.444514 | -1.215150 |
| H | 1.796370  | -1.444514 | 1.215150  |
| H | 0.005075  | 1.450506  | 2.505220  |
| H | 0.005075  | 1.450506  | -2.505220 |
| H | 0.871152  | -2.958268 | -1.175200 |
| H | 0.871152  | -2.958268 | 1.175200  |
| C | 0.178959  | 2.635117  | 0.698060  |
| C | 0.178959  | 2.635117  | -0.698060 |
| H | 0.317397  | 3.570024  | 1.234734  |
| H | 0.317397  | 3.570024  | -1.234734 |

---

**3S** E = -271.4690108

---

|   |          |           |           |
|---|----------|-----------|-----------|
| C | 0.000000 | 0.727349  | -0.068160 |
| C | 0.000000 | -0.727349 | -0.068160 |
| C | 0.000000 | 1.427121  | -1.317059 |
| C | 0.000000 | -1.427121 | -1.317059 |
| C | 0.000000 | -1.248699 | 1.215772  |
| C | 0.000000 | 1.248699  | 1.215772  |
| H | 0.000000 | -2.287297 | 1.516910  |
| H | 0.000000 | 2.287297  | 1.516910  |
| S | 0.000000 | 0.000000  | 2.397219  |
| H | 0.000000 | 2.513846  | -1.322223 |
| H | 0.000000 | -2.513846 | -1.322223 |
| C | 0.000000 | 0.717179  | -2.486269 |
| C | 0.000000 | -0.717179 | -2.486269 |
| H | 0.000000 | 1.241378  | -3.438147 |
| H | 0.000000 | -1.241378 | -3.438147 |

| <b>3S-TS</b>     |           |           | <b>3S-Pr</b>     |   |           |           |           |
|------------------|-----------|-----------|------------------|---|-----------|-----------|-----------|
| E = -271.4690108 |           |           | E = -271.4690108 |   |           |           |           |
| C                | -0.311069 | 0.416784  | 0.713416         | C | -0.069262 | 0.443164  | 0.703887  |
| C                | -0.311069 | 0.416784  | -0.713416        | C | -0.069262 | 0.443164  | -0.703887 |
| C                | -0.097285 | 1.621608  | 1.417848         | C | -0.023846 | 1.634210  | 1.412211  |
| C                | -0.097285 | 1.621608  | -1.417848        | C | -0.023846 | 1.634210  | -1.412211 |
| C                | -0.422414 | -0.914688 | -1.219763        | C | -0.064134 | -0.991036 | -1.193381 |
| C                | -0.422414 | -0.914688 | 1.219763         | C | -0.064134 | -0.991036 | 1.193381  |
| H                | -0.588961 | -1.154001 | -2.264426        | H | -0.343155 | -1.144229 | -2.236569 |
| H                | -0.588961 | -1.154001 | 2.264426         | H | -0.343155 | -1.144229 | 2.236569  |
| S                | -1.136472 | -1.947729 | 0.000000         | S | -1.247918 | -1.812728 | 0.000000  |
| C                | 1.711000  | -1.502285 | -0.695663        | C | 1.298470  | -1.615853 | -0.780511 |
| C                | 1.711000  | -1.502285 | 0.695663         | C | 1.298470  | -1.615853 | 0.780511  |
| H                | 2.172198  | -0.684434 | -1.239015        | H | 2.126760  | -1.027063 | -1.190712 |
| H                | 2.172198  | -0.684434 | 1.239015         | H | 2.126760  | -1.027063 | 1.190712  |
| H                | -0.090188 | 1.624654  | 2.504912         | H | -0.020437 | 1.639122  | 2.499574  |
| H                | -0.090188 | 1.624654  | -2.504912        | H | -0.020437 | 1.639122  | -2.499574 |
| H                | 1.643350  | -2.438645 | -1.240334        | H | 1.379824  | -2.633039 | -1.173685 |
| H                | 1.643350  | -2.438645 | 1.240334         | H | 1.379824  | -2.633039 | 1.173685  |
| C                | 0.077261  | 2.795365  | 0.707784         | C | -0.002337 | 2.843007  | 0.696807  |
| C                | 0.077261  | 2.795365  | -0.707784        | C | -0.002337 | 2.843007  | -0.696807 |
| H                | 0.210422  | 3.733551  | 1.239816         | H | 0.007006  | 3.786070  | 1.236793  |
| H                | 0.210422  | 3.733551  | -1.239816        | H | 0.007006  | 3.786070  | -1.236793 |
